# Supplementary material
Source: ML conference proceedings conference paper supplement (https://openreview.net/forum?id=sJl73HJGNj)
Supplement: supplementary_material [file AiDE-Q (Full-version)-Neurips2025.pdf › Neurips2025_SM/AiDE-Q (Full-version)-Neurips2025.pdf]

---

# AiDE-Q: Synthetic Labeled Datasets Can Enhance Learning Models for Quantum Property Estimation

---

Anonymous Author(s)

Affiliation

Address

email

## Abstract

Quantum many-body problems are central to various scientific disciplines, yet their ground-state properties are intrinsically challenging to estimate. Recent advances in deep learning (DL) offer potential solutions in this field, complementing prior purely classical and quantum approaches. However, existing DL-based models typically assume access to a large-scale and noiseless labeled dataset collected by infinite sampling. This idealization raises fundamental concerns about their practical utility, especially given the limited availability of quantum hardware in the near term. To unleash the power of these DL-based models, we propose AiDE-Q (automatic data engine for quantum property estimation), an effective framework that addresses this challenge by iteratively generating high-quality synthetic labeled datasets. Specifically, AiDE-Q utilizes a consistency-check method to assess the quality of synthetic labels and continuously improves the employed DL models with the identified high-quality synthetic dataset. To verify the effectiveness of AiDE-Q, we conduct extensive numerical simulations on a diverse set of quantum many-body and molecular systems, with up to 50 qubits. The results show that AiDE-Q enhances prediction performance for various reference learning models, with improvements of up to 14.2%. Moreover, we exhibit that a basic supervised learning model integrated with AiDE-Q outperforms advanced reference models, highlighting the importance of a synthetic dataset. Our work paves the way for more efficient and practical applications of DL for quantum property estimation.

## 1 Introduction

Many fundamental problems across diverse scientific disciplines, from condensed matter physics to quantum chemistry and materials science, can be reduced to solving quantum many-body problems [1–3]. A central challenge in this regime is characterizing ground-state properties, a task known as quantum property estimation (QPE), which offers critical insight into the behavior of complex quantum systems [4–6]. Numerous methods have been proposed towards QPE, ranging from classical simulations [7–11] to quantum algorithms for state learning [12–17], but their applicability remains limited. That is, classical simulations face exponential computational costs as the system size increases [18, 19], while quantum algorithms often require extensive measurements and complex operations to evaluate intricate properties such as entanglement entropy [20, 21]. These difficulties are further compounded by the scarcity of quantum resources in the early stages of quantum computing.

Learning-based approaches, especially deep learning (DL) algorithms, have recently emerged as promising solutions for QPE [22–38], particularly for systems with shared features. These methods involve training a deep neural network on a large dataset of measurement data obtained from quantum many-body states with varying parameters, then leveraging the trained model to predict the properties of previously unseen quantum states. Over the past years, huge efforts have been devoted to exploring

different learning paradigms and neural architectures to achieve accurate property estimation while using fewer measurements. In this endeavor, existing DL models can be broadly categorized into three paradigms, which are *supervised learning* [39–49], *semi-supervised learning* [50], and *self-supervised learning and fine-tuning* [51, 52]. Despite their promise, all of these approaches often assume access to high-quality training datasets with exact labels, overlooking the exponentially increasing overhead of dataset construction as the system size grows. This ignorance poses two severe issues: (i) The reported empirical results fail to reflect the true performance of these methods in real-world scenarios. (ii) How to train these DL models with limited quantum resources remains unknown.

Compared to training on ideal datasets with exact labels, learning under limited quantum resources poses substantially greater challenges for DL models. Specifically, in this scenario, we have three choices for the dataset construction: (i) a dataset consisting of small samples with approximately accurate labels; (ii) a dataset consisting of a large number of samples with noisy labels; (iii) a hybrid dataset consisting of few samples with approximately accurate labels and numerous samples with noisy labels. Notably, the first two choices are denied by the well-established principle in DL theory, where small-size datasets lead to overfitting and poor generalization, and a dataset with noisy labels often results in incorrect learning [53–56]. As a viable alternative, hybrid datasets offer a principled compromise, enabling a balance between label accuracy and dataset scale under realistic resource constraints. However, direct training on the hybrid dataset could *significantly degrade* the predictive performance of DL models, as empirical evidence is given in Fig. 1. In this regard, a critical question is: *How to maximally exploit the hybrid dataset to improve the performance of DL models in QPE?*

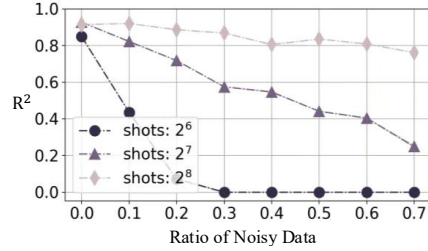

Figure 1: Coefficient of determination  $R^2$  of DL models for predicting entanglement entropy of 50-qubit Heisenberg models. The prediction performance decreases as the ratio of noisy labels in training datasets increases or the number of measurements decreases.

To address this question, here we propose **AiDE-Q** (**A**utomatic **D**ata **E**ngine for **Q**PE), a *simple but effective* framework inspired by traditional data engines [57–63] that iteratively enhances DL models by acquiring data with high-quality synthetic labels for training. A notable feature of AiDE-Q is its **compatibility** to most DL models for QPE. Without increasing any measurement overhead, AiDE-Q demonstrably enhances the performance of the underlying DL model. On the algorithmic level, our **key technical contribution** is introducing a *consistency-check method* of AiDE-Q to assess the quality of the synthetic labels and select the high-quality data to further train the employed DL model. Unlike traditional data engines [57, 58, 62], which typically rely on extensive manual intervention for labeling and selecting high-quality data, AiDE-Q automates this process by employing a DL model for data labeling and a consistency-check module for data selection. As an **additional contribution**, we systematically conduct extensive numerical experiments for integrating AiDE-Q into various DL paradigms on predicting the entanglement entropy and correlation of the Heisenberg XXZ model and cluster Ising model with up to 50 qubits. The results show that AiDE-Q could effectively improve the prediction performance of various reference DL models, with the highest improvement reaching 14.2%. A notable phenomenon is that *a vanilla supervised learning model integrated with AiDE-Q outperforms the state-of-the-art reference learning models*. This finding underscores the critical role of pioneering synthetic data in advancing the applicability of learning-based methods to QPE tasks. We release the source code and dataset at [Github](#) to facilitate future research in this domain.

## 2 Preliminaries

In this section, we outline the essential background on quantum computation, classical shadows, and quantum property estimation (QPE). Additional technical details are provided in Appendix A.

**Basic of quantum computing.** The elementary unit of quantum computation is the *qubit* (or quantum bit) [64], which is the quantum mechanical analog of a classical bit. A qubit is a two-level quantum-mechanical system described by a unit vector in the Hilbert space  $\mathbb{C}^2$ . In Dirac notation, a qubit state is defined as  $|\phi\rangle = c_0|0\rangle + c_1|1\rangle \in \mathbb{C}^2$  where  $|0\rangle = [1, 0]^\dagger$  and  $|1\rangle = [0, 1]^\dagger$  specify two unit bases and the coefficients  $c_0, c_1 \in \mathbb{C}$  yield  $|c_0|^2 + |c_1|^2 = 1$ . Similarly, the *quantum state* of  $n$  qubits is defined as a unit vector in  $\mathbb{C}^{2^n}$ , i.e.,  $|\psi\rangle = \sum_{j=1}^{2^n} c_j |e_j\rangle$ , where  $|e_j\rangle \in \mathbb{R}^{2^n}$  is the computational

basis whose  $j$ -th entry is 1 and other entries are 0, and  $\sum_{j=1}^{2^n} |c_j|^2 = 1$  with  $c_j \in \mathbb{C}$ . Besides Dirac notation, the density matrix can be used to describe more general qubit states. For example, the density matrix of the state  $|\psi\rangle$  is  $\rho = |\psi\rangle\langle\psi| \in \mathbb{C}^{2^n \times 2^n}$ , where  $\langle\psi| = |\psi\rangle^\dagger$  refers to the complex conjugate transpose of  $|\psi\rangle$ . For a set of qubit states  $\{p_j, |\psi_j\rangle\}_{j=1}^m$  with  $p_j > 0$ ,  $\sum_{j=1}^m p_j = 1$ , and  $|\psi_j\rangle \in \mathbb{C}^{2^n}$  for  $j \in [m]$ , its density matrix is  $\rho = \sum_{j=1}^m p_j \rho_j$  with  $\rho_j = |\psi_j\rangle\langle\psi_j|$  and  $\text{Tr}(\rho) = 1$ .

The *quantum measurement* refers to the procedure of extracting classical information from the quantum state. It is mathematically specified by a Hermitian matrix  $H$  called the *observable*. Applying the observable  $H$  to the quantum state  $|\psi\rangle$  yields a random variable whose expectation value is  $\langle\psi| H |\psi\rangle$  or  $\text{Tr}(H\rho)$  for the density matrix  $\rho = |\psi\rangle\langle\psi|$ . For instance, applying computational basis measurement  $|0\rangle\langle 0|$  on a quantum state  $\rho$  for  $m$  times yields a bit string  $\mathbf{b} \in \{0, 1\}^m$ , and the estimated expectation values is given by  $\bar{\mathbf{b}} = \sum_{i=1}^m \mathbf{b}_i / m$  with  $\mathbb{E}(\bar{\mathbf{b}}) = \text{Tr}(\rho |0\rangle\langle 0|)$ .

**Classical shadow.** The classical shadow [13] of a quantum state  $\rho$  is constructed using a set of randomized measurements. Given a unitary operator  $U$  sampled from a unitary ensemble  $\mathcal{U}$ , and the subsequent measurement outcome  $\mathbf{b}$  under computational measurement, the classical shadow from one snapshot is represented by  $\hat{\rho} = \mathcal{N}^{-1}(U^\dagger |\mathbf{b}\rangle\langle\mathbf{b}| U)$ , where  $\mathcal{N}$  is a linear map associated with the measurement process. In this manuscript, we focus on the random Pauli measurement such that the classical shadow from  $m$  snapshots refers to  $\hat{\rho} = \frac{1}{m} \sum_{j=1}^m \bigotimes_{i=1}^N (3U_j^{(i)\dagger} |\mathbf{b}_j^{(i)}\rangle\langle\mathbf{b}_j^{(i)}| U_j^{(i)} - I_2)$ , where random unitaries  $U_j^{(i)}$  are sampled from the Pauli ensembles  $\mathcal{U} = \{I_2, X, Y, Z\}^{\otimes n} \setminus I_2^{\otimes n}$  with  $I_2 = \begin{pmatrix} 1 & 0 \\ 0 & 1 \end{pmatrix}$ , and  $X = \begin{pmatrix} 0 & -i \\ i & 0 \end{pmatrix}$ ,  $Y = \begin{pmatrix} 0 & -1 \\ 1 & 0 \end{pmatrix}$ ,  $Z = \begin{pmatrix} 1 & 0 \\ 0 & -1 \end{pmatrix}$  being Pauli-X, -Y, -Z operators.

**Quantum properties estimation (QPE).** We consider the QPE task for ground states of quantum many-body systems with physical parameters  $\mathbf{p}$ , described by a Hermitian  $H(\mathbf{p})$ . The *ground state*  $|\psi(\mathbf{p})\rangle$  is defined as the eigenvector relating to the minimum eigenvalues of  $H(\mathbf{p})$ . The task of QPE involves predicting properties  $f(\rho(\mathbf{p}))$  with  $\rho(\mathbf{p}) = |\psi(\mathbf{p})\rangle\langle\psi(\mathbf{p})|$  using the measurement outcomes  $\mathbf{o}$  obtained by applying measurement operators  $\mathbf{M}$  to the quantum state  $\rho(\mathbf{p})$ .

Two important QPE tasks are estimating the *Renyi entanglement entropy* and *two-point correlations* in quantum many-body systems, which are respectively defined as

$$S_A(\rho) = -\log_2 \text{Tr}(\rho_A^2), \text{ and } C_{ij}^\alpha(\rho) = \text{Tr}(\rho \sigma_i^\alpha \sigma_j^\alpha), \quad (1)$$

where  $\alpha \in \{z, x\}$ , and  $\sigma_i^\alpha$  ( $\sigma_i^x$ ) refers to the Pauli-Z (Pauli-X) operator acting on the  $i$ -th qubit. Here,  $A$  refers to the index set of the subsystem and  $\rho_A$  is the reduced density matrix of  $\rho$  on the subsystem  $A$ . For two-point correlations, the two indices  $i, j$  satisfy  $1 \leq i \neq j \leq n$ . These properties are widely studied as standard tasks in many studies of quantum states learning [13, 47, 51], and are essential for understanding critical behavior like phase transitions in quantum many-body systems [65, 66].

**Related work.** We highlight that there are no comparative studies with our work, as AiDE-Q is compatible with various DL-based models for QPE. Refer to Appendix B for elaborations.

### 3 Problem setup and implementation of AiDE-Q

For clarity, we recap the mechanism of DL models for QPE training on an ideal dataset in Sec. 3.1. Then, we formulate the learning-based QPE tasks with a limited measurement budget and present the implementation of AiDE-Q and exhibit its compatibility with various DL models in Sec. 3.2.

#### 3.1 Learning-based QPE models with an ideal dataset

Existing DL-based models for QPE can be broadly categorized into three learning paradigms: supervised learning (SL), semi-supervised learning (SSL), and self-supervised learning with fine-tuning (SSL-FT). Despite differences in label usage, all three follow a common two-stage pipeline: (i) dataset construction and (ii) model implementation and optimization. In what follows, we first describe the data collection process specific to QPE, and then summarize the learning procedures in each paradigm, emphasizing their differences at each stage. We defer the details to Appendix C.

**Data collection for QPE.** We define the classical data representation by reviewing the process of obtaining classical data through the classical shadow method, as introduced in Sec. 2. Consider an  $N$ -qubit quantum many-body state  $\rho(\mathbf{p})$  parameterized by a  $d$ -dimensional physical parameter  $\mathbf{p} \in \mathbb{R}^d$ , the classical shadow approach involves performing  $m$  random Pauli measurements, denoted

by  $\mathbf{M} = (\mathbf{M}_1, \dots, \mathbf{M}_m) \in \mathcal{U}^m$  on the quantum state  $\rho(\mathbf{p})$  with  $\mathcal{U}$  being the Pauli ensemble. The measurement outcomes are denoted by  $\mathbf{o} \in \{0, 1\}^{N_m}$ , where  $\mathbf{o}_{ij}$  refers to the outcome of the Pauli operator  $\mathbf{M}_i$  on the  $j$ -th qubit. As such, we define the *classical data description* of the quantum state  $\rho(\mathbf{p})$  as  $\mathbf{x}(\mathbf{p}) = (\mathbf{p}, \mathbf{M}, \mathbf{o})$ . Additionally, we denote the exact quantum properties of various subsystems by a *label vector*  $\mathbf{y}$ , where each entry  $y_i$  corresponds to a quantum property for a specific subsystem. For example, the label  $y_i$  for entanglement entropy of a subsystem  $A_i$  in Eq. (1) is given by  $S_{A_i}(\rho(\mathbf{p}))$ . Formally, a classical data point with the ideal label for explored properties for  $\rho(\mathbf{p})$  is

$$(\mathbf{x}(\mathbf{p}), \mathbf{y}(\mathbf{p})) \equiv (\mathbf{p}, \mathbf{M}(\mathbf{p}), \mathbf{o}(\mathbf{p}), \mathbf{y}(\mathbf{p})). \quad (2)$$

Through sampling different physical parameters  $\mathbf{p}$  from a specified distribution, the training dataset for DL models is constructed. Hereafter, for simplicity, we omit the dependence of  $\mathbf{x}$ ,  $\mathbf{M}$ ,  $\mathbf{o}$ , and  $\mathbf{y}$  on the parameters  $\mathbf{p}$  when no ambiguity arises, unless otherwise specified.

**Remark.** The data collection from quantum systems can utilize other measurement operators  $\mathbf{M}$  beyond random Pauli measurements, such as information-complete measurement operators [67, 68], to collect measurement outputs  $\mathbf{o}$ . Additionally, not all elements in the triplet  $(\mathbf{p}, \mathbf{M}, \mathbf{o})$  are necessary for model training, depending on the specific DL model being used. Refer to Appendix C for details.

**SL paradigm.** A large number of studies utilize the SL paradigm to address different QPE tasks, exploring various neural architectures such as multi-layer perceptrons [44, 47] and convolutional neural networks [29, 42, 46, 69], along with different loss functions like mean squared error (MSE) and cross-entropy. In this paradigm, the dataset  $\mathcal{S}_{\text{SL}} = \{(\mathbf{x}^{(i)}, \mathbf{y}^{(i)})\}_{i=1}^n$  is constructed to train the learning model  $f_{\text{SL}}$  under a loss function  $\mathcal{L}_{\text{SL}}$ , which for MSE is defined as,

$$\mathcal{L}_{\text{SL}} = \frac{1}{n} \sum_{i=1}^n \left\| f_{\text{SL}}(\mathbf{x}^{(i)}) - \mathbf{y}^{(i)} \right\|^2, \quad (3)$$

where  $\mathbf{x}^{(i)} = (\mathbf{p}^{(i)}, \mathbf{M}^{(i)}, \mathbf{o}^{(i)})$  are collected from  $n$  different quantum states  $\rho(\mathbf{p}^{(i)})$  with varying parameters  $\mathbf{p}^{(i)}$  sampled from a specific distribution  $\mathcal{D}$ . The exact labels  $\mathbf{y}^{(i)}$  are assumed to be available for all data in  $\mathcal{S}_{\text{SL}}$ . Finally, the trained model  $f_{\text{SL}}$  is used to predict the quantum properties  $\mathbf{y}'$  based on the collected data  $\mathbf{x}'$  collected from unseen quantum states  $\rho(\mathbf{p}')$ .

**SSL paradigm.** The SSL paradigm involves training a learning model  $f_{\text{SSL}}$  with a dataset consisting of both labeled and unlabeled data, i.e.,  $\mathcal{S}_{\text{SSL}} = \{(\mathbf{x}^{(i)}, \mathbf{y}^{(i)})\}_{i=1}^{n_l} \cup \{\mathbf{x}^{(i)}\}_{i=n_l+1}^n$ , where  $n_l$  is the number of labeled data points. The only work in this paradigm is Ref. [50], which exploits a teacher-student architecture to train the learning model  $f_{\text{SSL}}$ . Specifically, this architecture comprises a student model  $f_{\text{SSL}}$  and a teacher model  $f'_{\text{SSL}}$ , both sharing identical structural designs. The student model learns through both a supervised loss and a consistency loss

$$\mathcal{L}_{\text{SSL}} = \frac{1}{n_l} \sum_{i=1}^{n_l} \left\| f_{\text{SSL}}(\mathbf{x}^{(i)}) - \mathbf{y}^{(i)} \right\|^2 + \frac{\lambda}{n - n_l} \sum_{i=n_l+1}^n \left\| f_{\text{SSL}}(\mathbf{x}^{(i)}) - f'_{\text{SSL}}(\mathbf{x}^{(i)}) \right\|^2. \quad (4)$$

where  $\lambda$  refers to the consistency weight. The parameters of the teacher model are maintained as an exponential moving average of the student model's parameters throughout training [70]. Once trained, the student model  $f_{\text{SSL}}$  is employed to perform the prediction.

**SSL-FT paradigm.** The dataset  $\mathcal{S}_{\text{SF}}$  considered in SSL-FT is similar to  $\mathcal{S}_{\text{SSL}}$  in SSL, which consists of both labeled and unlabeled data. However, unlike SSL, SSL-FT first performs self-supervised learning on the unlabeled dataset to obtain a pre-trained model  $f_{\text{SF}}$  that can extract generic and meaningful hidden features, and then fine-tunes  $f_{\text{SF}}$  using the labeled data for specific QPE tasks [51, 52]. The loss function for model fine-tuning follows the SL paradigm, as defined in Eq. (3).

Despite the different learning paradigms and implementation details, almost all existing DL models utilize ideal labels  $\{\mathbf{y}^{(i)}\}$  during training, which are often unavailable due to the exponentially increasing computational overhead to acquire as the size of the quantum system grows. This limitation makes it unclear whether DL algorithms can effectively tackle QPE tasks in practice, where the number of measurements is restricted and the accessible dataset is hybrid.

### 3.2 Implementation of AiDE-Q towards the hybrid dataset

Before we present the implementation details of AiDE-Q, let us first formulate the objective of DL models given a hybrid dataset, where the total number of measurements for data collection is limited.

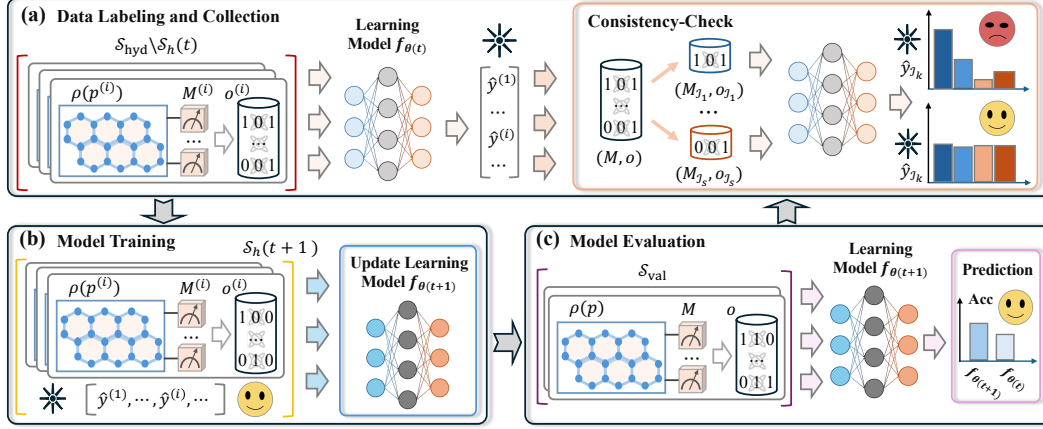

Figure 2: Framework of the AiDE-Q. AiDE-Q follows an iterative pipeline consisting of three primary stages: (a) *data labeling and collection*: this stage first use the trained model  $f_{\theta(t)}$  at the  $t$ -iteration to generate labels for the data in  $\mathcal{S}_{\text{hyd}} \setminus \mathcal{S}_h(t)$ , and then using the consistency-check to collect the data  $(p, \mathbf{M}, \mathbf{o})$  and its synthetic label  $\hat{\mathbf{y}}$  with small variance among the  $s$  generated labels  $\hat{\mathbf{y}}_{\mathcal{I}_k}$  of the masked data  $(\mathbf{M}_{\mathcal{I}_k}, \mathbf{o}_{\mathcal{I}_k})$ , as defined in Eq. (6); (b) *model training*: this stage further fine-tunes the DL model with the updated dataset  $\mathcal{S}_h(t+1)$  and obtain a new DL model  $f_{\theta(t+1)}$ ; (c) *model evaluation*: the updated DL model  $f_{\theta(t+1)}$  is evaluated on a validation dataset  $\mathcal{S}_{\text{val}}$  to examine whether the prediction performance is improved compared to  $f_{\theta(t)}$ .

**DL-based models for QPE with a hybrid dataset.** To account for practical measurement overhead, the label of  $\rho(p)$  can only be derived from collected measurement data  $\mathbf{o}(p)$  in Eq. (2). As a result, the label may be noisy, with the noise level determined by the number of measurements  $m$ . Let the noisy label of  $\rho(p)$  be  $\hat{\mathbf{y}}$ . Without loss of generality, the hybrid dataset takes the form as

$$\mathcal{S}_{\text{hyd}} = \mathcal{S}_L \cup \mathcal{S}_U, \text{ with } \mathcal{S}_L = \{\mathbf{x}^{(i)} | \mathbf{o}^{(i)} \in \mathbb{R}^{Nm_l}\}_{i=1}^{n_l} \text{ and } \mathcal{S}_U = \{\mathbf{x}^{(i)} | \mathbf{o}^{(i)} \in \mathbb{R}^{Nm_u}\}_{i=n_l+1}^{n_l+n_u}, \quad (5)$$

where the training dataset  $\mathcal{S}_{\text{hyd}}$  consists of  $\mathcal{S}_L$  and  $\mathcal{S}_U$ , in which the number of examples are respectively denoted as  $n_l$  and  $n_u$ . The number of measurements per example in  $\mathcal{S}_L$  and  $\mathcal{S}_U$  is denoted by  $m_l$  and  $m_u$  with  $m_l > m_u$ . Specifically, each example in  $\mathcal{S}_L$  contains a large number of measurements, yielding a small difference with the accurate label  $\mathbf{y}$ . In contrast,  $\mathcal{S}_U$  contains more data points  $n_u$ , though at the cost of increased label noise between  $\hat{\mathbf{y}}$  and  $\mathbf{y}$ .

**Overview of AiDE-Q.** Our initial empirical findings, as shown in Fig. 1, suggest that naively training existing DL models on the hybrid dataset  $\mathcal{S}_{\text{hyd}}$  can result in suboptimal predictive performance. This underscores the need for novel methods that allow DL-based models for QPE to efficiently learn from hybrid datasets and deliver accurate predictions.

To address this challenge, we propose the automatic data engine for QPE (AiDE-Q), an effective and scalable framework that automatically identifies and generates high-quality data labels through iterative interactions between various learning models and the hybrid dataset, thereby continually enhancing model performance. An overview of AiDE-Q is shown in Fig. 2. Given a learning model  $f_{\theta}$  and a hybrid dataset  $\mathcal{S}_{\text{hyd}}$  in Eq. (5), AiDE-Q involves iteratively updating a subset of the training dataset  $\mathcal{S}_h \subset \mathcal{S}_{\text{hyd}}$  with high-quality labels and training  $f_{\theta}$  on this updated dataset  $\mathcal{S}_h$ . For clarity, denote  $\mathcal{S}_h(t)$  as the high-quality dataset after  $t$  updates, and  $f_{\theta(t)}$  as the learning model trained on  $\mathcal{S}_h(t)$ . Initially, we set  $\mathcal{S}_h(0) = \mathcal{S}_L$ ; the employed learning model is flexible, i.e.,  $f_{\theta(0)} \in \{f_{\text{SL}}, f_{\text{SSL}}, f_{\text{SF}}\}$ , which is optimized under the corresponding loss as defined in Eq. (3) and Eq. (4). Once  $f_{\theta(0)}$  and  $\mathcal{S}_h(0)$  are prepared, AiDE-Q follows an iterative pipeline consisting of three primary stages: *data labeling*, *model training*, and *model evaluation*. In what follows, we detail the procedure of AiDE-Q at the  $t$ -th update with  $0 < t \leq T$  and  $T$  being the total number of updates.

**Stage I: data labeling.** This stage aims to generate and identify more data with high-quality labels from  $\mathcal{S}_U$  using the learning model  $f_{\theta}$ , and collect the newly identified data  $\{(\mathbf{x}, \hat{\mathbf{y}} = f_{\theta}(\mathbf{x}))\}$  into the updated high-quality dataset  $\mathcal{S}_h(t+1)$ . More specifically, we define the *data quality* of a data point  $(\mathbf{x}, \hat{\mathbf{y}})$  as the closeness between the synthetic label  $\hat{\mathbf{y}}$  generated by the learning model  $f_{\theta}$  and the ideal label  $\mathbf{y}$ . However,  $\mathbf{y}$  is generally unavailable due to the prohibitive acquisition cost. In this regard, to evaluate the quality of data with a finite number of measurements, we propose a *consistency-check method* that examines the confidence of  $\hat{\mathbf{y}}$  as an alternative.



The core idea behind the consistency-check method is to evaluate the variance of synthetic labels generated by  $f_\theta$  using partial measurement outputs, randomly selected from  $(\mathbf{M}, \mathbf{o})$ . As shown in Fig. 2(a), for a given data point  $(\mathbf{x}, f_\theta(\mathbf{x}))$  with  $\mathbf{x} = (\mathbf{p}, \mathbf{M}, \mathbf{o})$  and  $\mathbf{M}, \mathbf{o} \in \mathbb{R}^{N^m}$ , we randomly sample  $s$  subset  $\{\mathbf{x}_{\mathcal{I}_k} := (\mathbf{p}, \mathbf{M}_{\mathcal{I}_k}, \mathbf{o}_{\mathcal{I}_k})\}_{k=1}^s$  from the input data  $\mathbf{x}$ , where  $\mathcal{I}_k \subset [m]$  refers to the index set uniformly sampled from the set of all column indices of the measurement outputs  $\mathbf{o} \in \{0, 1\}^{N^m}$ . For each subset, we generate the synthetic labels with  $\hat{\mathbf{y}}_{\mathcal{I}_k} = f_\theta(\mathbf{x}_{\mathcal{I}_k})$ . We call  $(\mathbf{x}_{\mathcal{I}_k}, \hat{\mathbf{y}}_{\mathcal{I}_k})$  the *masked data* corresponding to  $(\mathbf{x}, f_\theta(\mathbf{x}))$ . Subsequently, we examine the consistency level of  $f_{\theta(t)}(\mathbf{x})$  by computing the variance over the  $s$  masked estimations  $\hat{\mathbf{y}}_{A_k}$ , i.e.,

$$\text{Var}(\hat{\mathbf{y}}) = \frac{1}{s} \sum_{k=1}^s \|\hat{\mathbf{y}}_{\mathcal{I}_k} - \bar{\mathbf{y}}\|^2, \text{ with } \bar{\mathbf{y}} = \frac{1}{s} \sum_{k=1}^s \hat{\mathbf{y}}_{\mathcal{I}_k}. \quad (6)$$

The synthetic labels  $\hat{\mathbf{y}} = f_\theta(\mathbf{x})$  estimated with a large number of measurements  $m$  or a powerful learning model  $f_\theta$  lead to an accurate approximation to  $\mathbf{y}$  with a small variance  $\text{Var}(\hat{\mathbf{y}})$ , and hence could be regarded as high-quality data.

Supported by the proposed consistency-check method, AiDE-Q assess  $\text{Var}(\hat{\mathbf{y}})$  of all training examples  $\mathbf{x} \in \mathcal{S}_{\text{hyd}} \setminus \mathcal{S}_h(t)$ . Those training examples whose  $\text{Var}(\hat{\mathbf{y}})$  is less than a given threshold  $\tau$  are identified as the high-quality labeled data and incorporated into the updated high-quality dataset  $\mathcal{S}_h(t+1)$ .

*Stage II: model training.* After Stage I, the learning model  $f_{\theta(t)}$  will be further trained on the updated high-quality dataset  $\mathcal{S}_h(t+1)$ , yielding an updated learning model  $f_{\theta(t+1)}$ . In particular, when  $t = 0$ , any learning paradigm introduced in Sec. 3.1 could be employed to train the learning model  $f_{\theta(0)}$  on the whole dataset  $\mathcal{S}_{\text{hyd}}$ . As shown in Fig. 2(b), when  $t > 1$ , the learning model  $f_{\theta(t)}$  is optimized on the updated high-quality dataset  $\mathcal{S}_h(t+1)$  by minimizing the loss function

$$\mathcal{L}(\theta) = \frac{1}{|\mathcal{S}_h(t+1)|} \sum_{\mathbf{x} \in \mathcal{S}_h(t+1)} \|f_\theta(\mathbf{x}) - \hat{\mathbf{y}}\|^2, \quad (7)$$

where  $|\mathcal{S}_h(t+1)|$  refers to the size of dataset  $\mathcal{S}_h(t+1)$  and  $\hat{\mathbf{y}}$  denotes the synthetic labels in  $\mathcal{S}_h(t+1)$ . Here, the optimized parameters  $\theta(t)$  in the model  $f_{\theta(t)}$  serve as the initial parameters for model training of  $f_\theta$  on the dataset  $\mathcal{S}_h(t+1)$ . Throughout  $T$  iterations, the neural architecture in  $f_\theta$  remains unchanged, while only the parameters  $\theta$  are updated.

*Stage III: model evaluation.* As shown in Fig. 2(c), the updated  $f_{\theta(t+1)}$  obtained from Stage II is evaluated on a validation dataset  $\mathcal{S}_{\text{val}}$  to assess whether its predictive performance has improved relative to the previous model  $f_{\theta(t)}$ . This evaluation determines whether the updated model  $f_{\theta(t+1)}$  should be adopted for subsequent iterations. The employed validation dataset consists of quantum data  $\mathbf{x}$  with the same number of measurements as the data in  $\mathcal{S}_U$ , i.e.,  $m = m_u$ , while the corresponding label  $\hat{\mathbf{y}}$  are estimated by a larger number of measurement outcomes with  $m = m_l$ . If the performance of  $f_{\theta(t+1)}$  decreases compared to  $f_{\theta(t)}$ , the newly added high-quality data in  $\mathcal{S}_h(t)$  may contain erroneous or harmful samples. In this case, AiDE-Q raises the threshold  $\tau$  in the consistency-check module, re-initiating the high-quality labeled data collection, model training, and evaluation process until the model's performance on the validation dataset  $\mathcal{S}_{\text{val}}$  improves. This ensures that only reliable and informative samples that positively contribute to model generalization are included in the updated high-quality dataset  $\mathcal{S}_h(t+1)$ .

**Remark.** The AiDE-Q framework is flexible and can be integrated into other learning models, such as machine learning models [31, 36]. Refer to Appendix D for the discussion.

## 4 Experiments

In this section, we conduct extensive studies about the effectiveness of AiDE-Q on two standard quantum systems: the Heisenberg XXZ model and the one-dimensional cluster-Ising model. Refer to Appendix E for the omitted details and more results.

### 4.1 Data constructions for the explored quantum systems

**Heisenberg XXZ model.** An  $N$ -qubit Heisenberg XXZ model is defined by the Hamiltonian [71]

$$H = J \sum_{i=1}^{N/2} (\sigma_{2i-1}^x \sigma_{2i}^x + \sigma_{2i-1}^y \sigma_{2i}^y + \sigma_{2i-1}^z \sigma_{2i}^z) + J' \sum_{i=1}^{N/2-1} (\sigma_{2i}^x \sigma_{2i+1}^x + \sigma_{2i}^y \sigma_{2i+1}^y + \sigma_{2i}^z \sigma_{2i+1}^z), \quad (8)$$

Table 1:  $R^2$  in predicting the entanglement entropy  $S_A$ , two-point correlations  $C_{1j}^x$  and  $C_{1j}^z$  of 10-qubit XXZ model, where  $A = [j]$  and  $j \in [N - 1]$ . The number of measurements for low-quality data is set as  $m_u = 2^6$ . The best results are emphasized in blue while the second-best results are distinguished in orange.

| Method   | $S_A$     |           |           | $C_{1j}^x$ |           |           | $C_{1j}^z$ |           |           |
|----------|-----------|-----------|-----------|------------|-----------|-----------|------------|-----------|-----------|
|          | $r = 0.4$ | $r = 0.6$ | $r = 0.8$ | $r = 0.4$  | $r = 0.6$ | $r = 0.8$ | $r = 0.4$  | $r = 0.6$ | $r = 0.8$ |
| SL       | 0.722     | 0.740     | 0.820     | 0.848      | 0.883     | 0.930     | 0.915      | 0.936     | 0.953     |
| SSL4Q    | 0.823     | 0.804     | 0.814     | 0.938      | 0.951     | 0.951     | 0.958      | 0.966     | 0.958     |
| LLM4QPE  | 0.745     | 0.814     | 0.857     | 0.851      | 0.891     | 0.937     | 0.923      | 0.933     | 0.961     |
| NTK      | -         | -         | -         | 0.864      | 0.799     | 0.910     | 0.966      | 0.267     | 0.901     |
| CS       | -         | -         | -         | 0.308      | 0.308     | 0.308     | 0.605      | 0.605     | 0.605     |
| SL w. DE | 0.825     | 0.864     | 0.904     | 0.944      | 0.972     | 0.985     | 0.966      | 0.978     | 0.989     |

where  $J$  and  $J'$  refer to the alternating nearest-neighbor spin couplings, and  $\sigma_i^x$  ( $\sigma_i^z$ ) represent the Pauli-X (Pauli-Z) operator acting on the  $i$ -th qubit. The focus on the Heisenberg model is because it is an important statistical mechanical model used to study the behaviors of magnetic systems [72].

We consider a set of ground states corresponding to  $n$  uniformly sampled coupling parameters from the region of  $J/J' \in (0, 2)$ . The system size  $N$  is varied as  $N \in \{10, 20, 30, 40, 50\}$ , with the corresponding number of sampled parameters for each system size being  $n \in \{720, 1280, 1860, 2740\}$ . For the hybrid dataset in Eq. (5), the ratio of the number of high-quality data  $n_l$  to the total dataset size  $n$  is defined as  $r := n_l/n \in \{0.2, 0.4, 0.6, 0.8\}$ . The number of measurements for the initial high-quality dataset  $\mathcal{S}_L$  is set to  $m_l = 2^{10}$ , while for the initial low-quality dataset  $\mathcal{S}_U$ , the number of measurements is  $m_u \in \{2^5, 2^6, 2^7, 2^8, 2^9\}$ . The validation dataset consists of  $n_{\text{val}} = 120$  data points, with the number of measurements set to  $m_{\text{val}} = m_u$ .

**Cluster Ising model.** The  $N$ -qubit cluster Ising model [73], parameterized by a two-dimensional vector  $(h_1, h_2)$ , is defined by the Hamiltonian

$$H_{\text{CI}} = - \sum_{i=1}^{N-2} \sigma_i^z \sigma_{i+1}^x \sigma_{i+2}^z - h_1 \sum_{i=1}^N \sigma_i^x - h_2 \sum_{i=1}^{N-1} \sigma_i^x \sigma_{i+1}^x. \quad (9)$$

This system has been extensively applied to describe a variety of quantum systems and is closely related to combinatorial optimization problems [74–76]. For the hybrid dataset construction, we uniformly sample  $n$  different parameter values in the region  $h_1/h_2 \in (0, 2)$ . The number of qubits and the training dataset size are set to  $N = 9$  and  $n = 720$ , respectively. Other hyperparameters used to build the hybrid dataset in Eq. (2) are set to be the same as those used in Heisenberg XXZ models.

**QPE tasks.** We focus on the non-linear property, entanglement entropy  $S_A$ , and linear properties, two-point correlations  $C_{1j}^x, C_{1j}^z$ , as defined in Eq. (1). Here, the subsystem  $A$  is defined as  $A = [1, \dots, j]$  and the index  $j$  ranges in  $\{2, \dots, N\}$ . In this regard, the data label  $\mathbf{y}$  or the synthetic label  $\hat{\mathbf{y}}$ , which corresponds to the properties of interest for a given input  $\mathbf{x}$ , is an  $(N - 1)$ -dimensional vector.

## 4.2 Experimental settings

**Reference models.** The first reference model is classical shadow (CS) [13], a learning-free protocol for efficiently predicting various properties of quantum states. For machine-learning-based baselines, we include the neural tangent kernel (NTK) [31] as a representative classical model. Among DL-based models for QPE tasks, we adopt SSL4Q as the reference for the SSL paradigm [50] and LLM4QPE for the SF paradigm [51]. To evaluate AiDE-Q’s predictive capabilities under the SL paradigm, we benchmark it as a standalone SL model. All DL models employ identical neural network architectures for feature representations to ensure a fair comparison. Refer to Appendix E for details.

**Evaluation metrics.** To assess the predictive performance of different learning models, we use the coefficient of determination ( $R^2$ ) as the evaluation metric. Specifically, given the test dataset with ground-truth labels  $\{(\mathbf{x}^{(i)}, \mathbf{y}^{(i)})\}_{i=1}^{n_{\text{te}}}$  of size  $n_{\text{te}}$ , the coefficient of determination is defined as

$$R^2 = 1 - \frac{\sum_{i=1}^{n_{\text{te}}} (\mathbf{y}^{(i)} - f(\mathbf{x}^{(i)}))^2}{\sum_{i=1}^{n_{\text{te}}} (\mathbf{y}^{(i)} - \bar{\mathbf{y}})^2}, \quad (10)$$

where  $\bar{\mathbf{y}} = \sum_{i=1}^{n_{\text{te}}} \mathbf{y}^{(i)} / n_{\text{te}}$  refers to the mean of the true values of the property of interest in the training dataset, and  $f(\mathbf{x}^{(i)})$  denotes the predicted values from the employed learning model. The

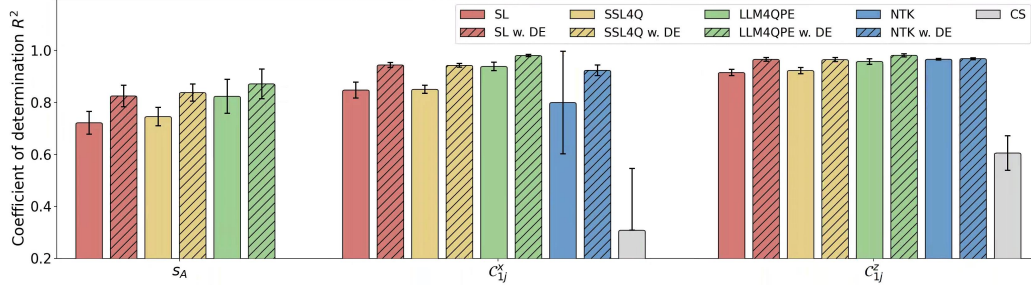

Figure 3:  $R^2$  of reference models with and without integrating AiDE-Q in predicting entanglement entropy  $S_A$ , two-point correlations  $C_{ij}^x$  and  $C_{ij}^z$  of 10-qubit XXZ model, where  $A = [j]$  and  $j \in [N - 1]$ . The initial ratio of high-quality data and the number of measurements for low-quality data is set as  $r = 0.4$  and  $m_u = 2^6$ .

quantity  $R^2$  typically ranges from 0 to 1, with larger  $R^2$  indicating that the model achieves better predictive accuracy. Specifically, when the model’s predictions perfectly match the true values, we have  $\sum_{i=1}^{n_{te}} (\mathbf{y}^{(i)} - f(\mathbf{x}^{(i)}))^2 = 0$  and  $R^2 = 1$ . This metric eliminates the influence of the magnitude of estimated properties, providing a clearer assessment of a model’s predictive ability.

**Hyperparameter settings of AiDE-Q.** The maximum number of iterations of AiDE-Q is set to  $T = 6$ . For consistency-checking in each iteration, the measurement data is divided into  $s = 5$  subsets, each containing 25% of the total number of measurements. Data points whose consistency levels for the synthetic labels fall within the top 10% are used to retrain the learning models.

### 4.3 Experimental results

Despite the wide range of possible hyperparameter configurations, we present numerical results for selected settings to demonstrate AiDE-Q’s predictive capabilities when integrated with various learning models, with more numerical results provided in Appendix E.

**Supervised learning models integrated with AiDE-Q outperform all reference models.** Table 1 presents the coefficient of determination  $R^2$  for predicting entanglement entropy and two-point correlations for the 10-qubit Heisenberg XXZ model. The results are shown for both machine learning and DL models, with varying ratios of the initial high-quality dataset  $S_L$ , while the number of measurements is fixed at  $m_u = 2^6$ . It can be observed that although DL models trained under the SSL (SSL4Q) and SSL-FT (LLM4QPE) paradigm outperform those trained under the SL paradigm by utilizing the dataset  $S_U$  as unlabeled dataset during training, the SL model incorporated with AiDE-Q demonstrate significantly performance improvement, and consistently achieve superior prediction accuracy across different properties and various ratio settings, as evidenced by their higher  $R^2$ . The most substantial improvement occurs when predicting entanglement entropy with  $r = 0.6$ , where the SL model incorporated with AiDE-Q increases the  $R^2$  from 0.74 to 0.864 compared to the vanilla SL model. Notably, this surpasses the prediction performance of the optimal reference model, LLM4QPE, which only achieves an  $R^2$  of 0.857 even with a higher high-quality data ratio  $r = 0.8$ .

**AiDE-Q enhances the prediction performance of various DL-based models.** We further examine the  $R^2$  values of various learning models integrated with AiDE-Q in predicting quantum properties. Fig. 3 presents numerical results with setting  $r = 0.4$  and  $m_u = 2^6$ . The results demonstrate that all learning models show improved  $R^2$  after integrating the AiDE-Q into their vanilla learning models. Notably, the improvement is inversely proportional to the original performance—models with lower baseline  $R^2$  values show more substantial gains after AiDE-Q incorporation. For example, when predicting two-point correlations  $C_{ij}^z$ , the  $R^2$  values for LLM4QPE, SSL4Q, and NTK methods are improved by 0.042, 0.092, and 0.124 from their original  $R^2$  values 0.938, 0.851, and 0.799, respectively. These findings suggest that AiDE-Q is *compatible* with various learning paradigms, enhancing their prediction performance.

**The scalability of AiDE-Q.** We next evaluate the scalability of AiDE-Q by applying it to the task of predicting entanglement entropy across varying system sizes  $N \in \{10, 20, 30, 40, 50\}$  and fixed measurement number  $m_u = 2^6$ . The achieved results are shown in Fig. 4(a), demonstrating that incorporating AiDE-Q into the SL paradigm consistently enhances prediction performance across all



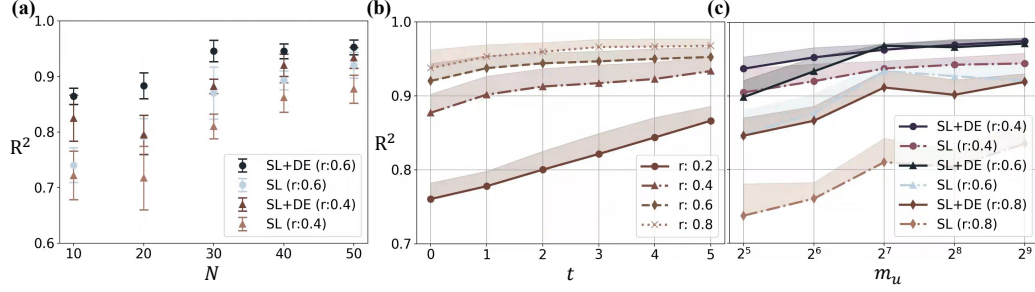

Figure 4:  $R^2$  in entanglement entropy prediction for the Heisenberg XXZ model. (a)  $R^2$  values of AiDE-Q-integrated SL models across varying quantum system sizes  $N$  with different total training dataset sizes and fixed  $m_u = 2^6$ . (b) Evolution of  $R^2$  across AiDE-Q's iterations for 50-qubit XXZ model and fixed  $m_u = 2^6$ . (c)  $R^2$  values with a varying number of measurements  $m_u$  for low-quality data points in 50-qubit XXZ model.

Table 2:  $R^2$  in predicting the entanglement entropy  $S_A$  of 9-qubit cluster Ising models with  $A = [j]$  and  $j \in [N - 1]$ . The best results are emphasized in blue while the second-best results are distinguished in orange.

| Method        | $m_u = 2^6$ |           |           | $m_u = 2^7$ |           |           | $m_u = 2^8$ |           |           |
|---------------|-------------|-----------|-----------|-------------|-----------|-----------|-------------|-----------|-----------|
|               | $r = 0.4$   | $r = 0.6$ | $r = 0.8$ | $r = 0.4$   | $r = 0.6$ | $r = 0.8$ | $r = 0.4$   | $r = 0.6$ | $r = 0.8$ |
| SL            | 0.226       | 0.356     | 0.51      | 0.255       | 0.234     | 0.559     | 0.317       | 0.444     | 0.443     |
| SSL4Q         | 0.422       | 0.448     | 0.489     | 0.501       | 0.539     | 0.626     | 0.513       | 0.58      | 0.616     |
| LLM4QPE       | 0.29        | 0.322     | 0.436     | 0.322       | 0.308     | 0.587     | 0.194       | 0.458     | 0.458     |
| SL w. DE      | 0.563       | 0.791     | 0.873     | 0.697       | 0.788     | 0.908     | 0.686       | 0.83      | 0.896     |
| SSL4Q w. DE   | 0.794       | 0.836     | 0.86      | 0.829       | 0.865     | 0.892     | 0.821       | 0.902     | 0.907     |
| LLM4QPE w. DE | 0.569       | 0.767     | 0.901     | 0.596       | 0.821     | 0.939     | 0.646       | 0.842     | 0.924     |

quantum system sizes and initial high-quality data ratios, as evidenced by increased  $R^2$  values. These results confirm AiDE-Q's scalability to larger many-body physics models.

**AiDE-Q improves the prediction performance with each iteration.** Fig. 4(b) shows the  $R^2$  values for entanglement entropy prediction across iterations of the AiDE-Q under the SL paradigm for the 50-qubit XXZ model. With varying initial ratios of high-quality data  $r \in \{0.2, 0.4, 0.6, 0.8\}$  and fixed measurement number  $m_u = 2^6$ , the  $R^2$  values consistently improve as AiDE-Q iterations progress, demonstrating AiDE-Q's effectiveness in identifying high-quality data with a synthetic label to enhance model generalization. Notably, smaller initial ratios of high-quality data yield larger performance improvements. For instance, at  $r = 0.2$ , AiDE-Q constantly increases the  $R^2$  from 0.76 to 0.87, achieving an improvement of 0.11, while the improvement is less than 0.07 for other ratios.

**The effect of the number of measurements on the AiDE-Q.** Fig. 4(c) shows the  $R^2$  values for entanglement entropy prediction, evaluated across different numbers of measurements for low-quality data,  $m_u \in \{2^5, \dots, 2^9\}$ , using SL models for the 50-qubit XXZ model. The numerical results demonstrate that increasing the measurement count  $m_u$  for the low-quality dataset  $\mathcal{S}_U$  effectively enhances the predictive performance of SL models, both with and without AiDE-Q integration.

**Experimental results on the cluster Ising Model.** Table 2 shows the coefficient of determination  $R^2$  of entanglement entropy prediction for the 9-qubit cluster Ising model. The results show that integrating AiDE-Q into different learning-based models could significantly improve their predictive performance for different ratios of high-quality data  $r \in \{0.4, 0.6, 0.8\}$  and measurement counts  $m_u \in \{2^6, 2^7, 2^8\}$ . This confirms AiDE-Q's effectiveness across diverse quantum systems.

## 5 Conclusion

In this study, we introduced AiDE-Q, a simple but effective framework that can be integrated into various learning paradigms for quantum property estimation (QPE) to improve the prediction performance of deep learning (DL) models, with limited quantum resources for dataset construction. Numerical experiments on the Heisenberg XXZ and cluster Ising models demonstrate AiDE-Q's effectiveness in enhancing the performance of several learning-based models, highlighting AiDE-Q's potential to improve the practicality of DL for QPE. However, a key limitation of our work is the unknown optimal allocation of limited quantum resources for constructing hybrid datasets.

## References

- [1] Henrik Bruus and Karsten Flensberg. *Many-body quantum theory in condensed matter physics: an introduction*. Oxford university press, 2004.
- [2] Bela Bauer, Sergey Bravyi, Mario Motta, and Garnet Kin-Lic Chan. Quantum algorithms for quantum chemistry and quantum materials science. *Chemical reviews*, 120(22):12685–12717, 2020.
- [3] Philippe Andre Martin and François Rothen. *Many-body problems and quantum field theory: an introduction*. Springer Science & Business Media, 2013.
- [4] Thomas Frauenheim, Gotthard Seifert, Marcus Elstner, Thomas Niehaus, Christof Köhler, Marc Amkreutz, Michael Sternberg, Zoltán Hajnal, Aldo Di Carlo, and Sándor Suhai. Atomistic simulations of complex materials: ground-state and excited-state properties. *Journal of Physics: Condensed Matter*, 14(11):3015, 2002.
- [5] Ingrid Rotter and JP Bird. A review of progress in the physics of open quantum systems: theory and experiment. *Reports on Progress in Physics*, 78(11):114001, 2015.
- [6] Thomas D Barrett, Aleksei Malyshev, and AI Lvovsky. Autoregressive neural-network wave-functions for ab initio quantum chemistry. *Nature Machine Intelligence*, 4(4):351–358, 2022.
- [7] Steven R White. Density matrix formulation for quantum renormalization groups. *Physical review letters*, 69(19):2863, 1992.
- [8] Walter Kohn. Nobel lecture: Electronic structure of matter—wave functions and density functionals. *Reviews of modern physics*, 71(5):1253, 1999.
- [9] Román Orús. Tensor networks for complex quantum systems. *Nature Reviews Physics*, 1(9):538–550, 2019.
- [10] Feng Pan and Pan Zhang. Simulation of quantum circuits using the big-batch tensor network method. *Physical Review Letters*, 128(3):030501, 2022.
- [11] Eric R Anschuetz, Andreas Bauer, Bobak T Kiani, and Seth Lloyd. Efficient classical algorithms for simulating symmetric quantum systems. *Quantum*, 7:1189, 2023.
- [12] Federico Becca and Sandro Sorella. *Quantum Monte Carlo approaches for correlated systems*. Cambridge University Press, 2017.
- [13] Hsin-Yuan Huang, Richard Kueng, and John Preskill. Predicting many properties of a quantum system from very few measurements. *Nature Physics*, 16(10):1050–1057, 2020.
- [14] GI Struchalin, Ya A Zagorovskii, EV Kovlakov, SS Straupe, and SP Kulik. Experimental estimation of quantum state properties from classical shadows. *PRX Quantum*, 2(1):010307, 2021.
- [15] Andreas Elben, Steven T Flammia, Hsin-Yuan Huang, Richard Kueng, John Preskill, Benoît Vermersch, and Peter Zoller. The randomized measurement toolbox. *Nature Reviews Physics*, 5(1):9–24, 2023.
- [16] Anurag Anshu and Srinivasan Arunachalam. A survey on the complexity of learning quantum states. *Nature Reviews Physics*, 6(1):59–69, 2024.
- [17] Haimeng Zhao, Laura Lewis, Ishaan Kannan, Yihui Quek, Hsin-Yuan Huang, and Matthias C Caro. Learning quantum states and unitaries of bounded gate complexity. *PRX Quantum*, 5(4):040306, 2024.
- [18] Xiaosi Xu, Simon Benjamin, Jinzhao Sun, Xiao Yuan, and Pan Zhang. A herculean task: Classical simulation of quantum computers. *arXiv preprint arXiv:2302.08880*, 2023.
- [19] Ashwin Nayak and Angus Lowe. Lower bounds for learning quantum states with single-copy measurements. *ACM Transactions on Computation Theory*, 2025.

- [20] Tiff Brydges, Andreas Elben, Petar Jurcevic, Benoît Vermersch, Christine Maier, Ben P Lanyon, Peter Zoller, Rainer Blatt, and Christian F Roos. Probing rényi entanglement entropy via randomized measurements. *Science*, 364(6437):260–263, 2019.
- [21] Andreas Elben, Benoit Vermersch, Christian F Roos, and Peter Zoller. Statistical correlations between locally randomized measurements: A toolbox for probing entanglement in many-body quantum states. *Physical Review A*, 99(5):052323, 2019.
- [22] Xun Gao and Lu-Ming Duan. Efficient representation of quantum many-body states with deep neural networks. *Nature communications*, 8(1):662, 2017.
- [23] Giuseppe Carleo and Matthias Troyer. Solving the quantum many-body problem with artificial neural networks. *Science*, 355(6325):602–606, 2017.
- [24] Juan Carrasquilla and Roger G Melko. Machine learning phases of matter. *Nature Physics*, 13(5):431–434, 2017.
- [25] Patrick Huembeli, Alexandre Dauphin, and Peter Wittek. Identifying quantum phase transitions with adversarial neural networks. *Physical Review B*, 97(13):134109, 2018.
- [26] Giacomo Torlai, Guglielmo Mazzola, Juan Carrasquilla, Matthias Troyer, Roger Melko, and Giuseppe Carleo. Neural-network quantum state tomography. *Nature physics*, 14(5):447–450, 2018.
- [27] Andrea Rocchetto, Edward Grant, Sergii Strelchuk, Giuseppe Carleo, and Simone Severini. Learning hard quantum distributions with variational autoencoders. *npj Quantum Information*, 4(1):28, 2018.
- [28] Juan Carrasquilla, Giacomo Torlai, Roger G Melko, and Leandro Aolita. Reconstructing quantum states with generative models. *Nature Machine Intelligence*, 1(3):155–161, 2019.
- [29] Benno S Rem, Niklas Käming, Matthias Tarnowski, Luca Asteria, Nick Fläschner, Christoph Becker, Klaus Sengstock, and Christof Weitenberg. Identifying quantum phase transitions using artificial neural networks on experimental data. *Nature Physics*, 15(9):917–920, 2019.
- [30] Giacomo Torlai, Brian Timar, Evert PL Van Nieuwenburg, Harry Levine, Ahmed Omran, Alexander Keesling, Hannes Bernien, Markus Greiner, Vladan Vuletić, Mikhail D Lukin, et al. Integrating neural networks with a quantum simulator for state reconstruction. *Physical review letters*, 123(23):230504, 2019.
- [31] Hsin-Yuan Huang, Richard Kueng, Giacomo Torlai, Victor V Albert, and John Preskill. Provably efficient machine learning for quantum many-body problems. *Science*, 377(6613):eabk3333, 2022.
- [32] Yan Zhu, Ya-Dong Wu, Ge Bai, Dong-Sheng Wang, Yuexuan Wang, and Giulio Chiribella. Flexible learning of quantum states with generative query neural networks. *Nature communications*, 13(1):6222, 2022.
- [33] Cole Miles, Rhine Samajdar, Sepehr Ebadi, Tout T Wang, Hannes Pichler, Subir Sachdev, Mikhail D Lukin, Markus Greiner, Kilian Q Weinberger, and Eun-Ah Kim. Machine learning discovery of new phases in programmable quantum simulator snapshots. *Physical Review Research*, 5(1):013026, 2023.
- [34] Haoxiang Wang, Maurice Weber, Josh Izaac, and Cedric Yen-Yu Lin. Predicting properties of quantum systems with conditional generative models. *arXiv preprint arXiv:2211.16943*, 2022.
- [35] Yuan-Hang Zhang and Massimiliano Di Ventra. Transformer quantum state: A multipurpose model for quantum many-body problems. *Physical Review B*, 107(7):075147, 2023.
- [36] Laura Lewis, Hsin-Yuan Huang, Viet T Tran, Sebastian Lehner, Richard Kueng, and John Preskill. Improved machine learning algorithm for predicting ground state properties. *nature communications*, 15(1):895, 2024.

- [37] Marc Wanner, Laura Lewis, Chiranjib Bhattacharyya, Devdatt Dubhashi, and Alexandru Gheorghiu. Predicting ground state properties: Constant sample complexity and deep learning algorithms. *arXiv preprint arXiv:2405.18489*, 2024.
- [38] Andi Gu, Lukasz Cincio, and Patrick J Coles. Practical hamiltonian learning with unitary dynamics and gibbs states. *Nature Communications*, 15(1):312, 2024.
- [39] Jun Gao, Lu-Feng Qiao, Zhi-Qiang Jiao, Yue-Chi Ma, Cheng-Qiu Hu, Ruo-Jing Ren, Ai-Lin Yang, Hao Tang, Man-Hong Yung, and Xian-Min Jin. Experimental machine learning of quantum states. *Physical review letters*, 120(24):240501, 2018.
- [40] Xiaoqian Zhang, Maolin Luo, Zhaodi Wen, Qin Feng, Shengshi Pang, Weiqi Luo, and Xiaoqi Zhou. Direct fidelity estimation of quantum states using machine learning. *Physical Review Letters*, 127(13):130503, 2021.
- [41] Peter Cha, Paul Ginsparg, Felix Wu, Juan Carrasquilla, Peter L McMahon, and Eun-Ah Kim. Attention-based quantum tomography. *Machine Learning: Science and Technology*, 3(1):01LT01, 2021.
- [42] Tobias Schmale, Moritz Reh, and Martin Gärttner. Efficient quantum state tomography with convolutional neural networks. *npj Quantum Information*, 8(1):115, 2022.
- [43] Tailong Xiao, Jingzheng Huang, Hongjing Li, Jianping Fan, and Guihua Zeng. Intelligent certification for quantum simulators via machine learning. *npj Quantum Information*, 8(1):138, 2022.
- [44] Yulei Huang, Liangyu Che, Chao Wei, Feng Xu, Xinfang Nie, Jun Li, Dawei Lu, and Tao Xin. Measuring quantum entanglement from local information by machine learning. *arXiv preprint arXiv:2209.08501*, 2022.
- [45] Korbinian Kottmann, Patrick Huembeli, Maciej Lewenstein, and Antonio Acín. Unsupervised phase discovery with deep anomaly detection. *Physical Review Letters*, 125(17):170603, 2020.
- [46] Ya-Dong Wu, Yan Zhu, Ge Bai, Yuexuan Wang, and Giulio Chiribella. Quantum similarity testing with convolutional neural networks. *Physical Review Letters*, 130(21):210601, 2023.
- [47] Ya-Dong Wu, Yan Zhu, Yuexuan Wang, and Giulio Chiribella. Learning quantum properties from short-range correlations using multi-task networks. *Nature Communications*, 15(1):8796, 2024.
- [48] Yuxuan Du, Yibo Yang, Tongliang Liu, Zhouchen Lin, Bernard Ghanem, and Dacheng Tao. Shadownet for data-centric quantum system learning. *arXiv preprint arXiv:2308.11290*, 2023.
- [49] Yang Qian, Yuxuan Du, Zhenliang He, Min-Hsiu Hsieh, and Dacheng Tao. Multimodal deep representation learning for quantum cross-platform verification. *Physical Review Letters*, 133(13):130601, 2024.
- [50] Yehui Tang, Nianzu Yang, Mabiao Long, and Junchi Yan. Ssl4q: Semi-supervised learning of quantum data with application to quantum state classification. In *Forty-first International Conference on Machine Learning*, 2024.
- [51] Yehui Tang, Hao Xiong, Nianzu Yang, Tailong Xiao, and Junchi Yan. Towards llm4qpe: Unsupervised pretraining of quantum property estimation and a benchmark. In *The Twelfth International Conference on Learning Representations*, 2024.
- [52] Yehui Tang, Mabiao Long, and Junchi Yan. Quadim: A conditional diffusion model for quantum state property estimation. In *The Thirteenth International Conference on Learning Representations*, 2025.
- [53] Chiyuan Zhang, Samy Bengio, Moritz Hardt, Benjamin Recht, and Oriol Vinyals. Understanding deep learning requires rethinking generalization. *arXiv preprint arXiv:1611.03530*, 2016.
- [54] Hwanjun Song, Minseok Kim, Dongmin Park, Yooju Shin, and Jae-Gil Lee. Learning from noisy labels with deep neural networks: A survey. *IEEE transactions on neural networks and learning systems*, 34(11):8135–8153, 2022.

- [55] Daniel A Roberts, Sho Yaida, and Boris Hanin. *The principles of deep learning theory*, volume 46. Cambridge University Press Cambridge, MA, USA, 2022.
- [56] Vishal Goar and Nagendra Singh Yadav. Foundations of machine learning. In *Intelligent Optimization Techniques for Business Analytics*, pages 25–48. IGI Global, 2024.
- [57] Alexander Kirillov, Eric Mintun, Nikhila Ravi, Hanzi Mao, Chloe Rolland, Laura Gustafson, Tete Xiao, Spencer Whitehead, Alexander C Berg, Wan-Yen Lo, et al. Segment anything. In *Proceedings of the IEEE/CVF international conference on computer vision*, pages 4015–4026, 2023.
- [58] Nikhila Ravi, Valentin Gabeur, Yuan-Ting Hu, Ronghang Hu, Chaitanya Ryali, Tengyu Ma, Haitham Khedr, Roman Rädle, Chloe Rolland, Laura Gustafson, et al. Sam 2: Segment anything in images and videos. *arXiv preprint arXiv:2408.00714*, 2024.
- [59] Mingfu Liang, Jong-Chyi Su, Samuel Schuster, Sparsh Garg, Shiyu Zhao, Ying Wu, and Manmohan Chandraker. Aide: An automatic data engine for object detection in autonomous driving. In *Proceedings of the IEEE/CVF Conference on Computer Vision and Pattern Recognition*, pages 14695–14706, 2024.
- [60] Lihe Yang, Bingyi Kang, Zilong Huang, Xiaogang Xu, Jiashi Feng, and Hengshuang Zhao. Depth anything: Unleashing the power of large-scale unlabeled data. In *Proceedings of the IEEE/CVF Conference on Computer Vision and Pattern Recognition*, pages 10371–10381, 2024.
- [61] Youcai Zhang, Xinyu Huang, Jinyu Ma, Zhaoyang Li, Zhaochuan Luo, Yanchun Xie, Yuzhuo Qin, Tong Luo, Yaqian Li, Shilong Liu, et al. Recognize anything: A strong image tagging model. In *Proceedings of the IEEE/CVF Conference on Computer Vision and Pattern Recognition*, pages 1724–1732, 2024.
- [62] Josh Abramson, Jonas Adler, Jack Dunger, Richard Evans, Tim Green, Alexander Pritzel, Olaf Ronneberger, Lindsay Willmore, Andrew J Ballard, Joshua Bambrick, et al. Accurate structure prediction of biomolecular interactions with alphafold 3. *Nature*, 630(8016):493–500, 2024.
- [63] Daochen Zha, Zaid Pervaiz Bhat, Kwei-Herng Lai, Fan Yang, Zhimeng Jiang, Shaochen Zhong, and Xia Hu. Data-centric artificial intelligence: A survey. *ACM Computing Surveys*, 57(5): 1–42, 2025.
- [64] Michael A Nielsen and Isaac L Chuang. *Quantum computation and quantum information*. Cambridge University Press, 2010.
- [65] Matthew Rispoli, Alexander Lukin, Robert Schittko, Sooshin Kim, M Eric Tai, Julian Léonard, and Markus Greiner. Quantum critical behaviour at the many-body localization transition. *Nature*, 573(7774):385–389, 2019.
- [66] Luigi Amico, Rosario Fazio, Andreas Osterloh, and Vlatko Vedral. Entanglement in many-body systems. *Reviews of modern physics*, 80(2):517, 2008.
- [67] Mark M Wilde. *Quantum information theory*. Cambridge University Press, 2013.
- [68] John Watrous. *The theory of quantum information*. Cambridge university press, 2018.
- [69] Dominik Koutný, Laia Ginés, Magdalena Moczala-Dusanowska, Sven Höfling, Christian Schneider, Ana Predojević, and Miroslav Ježek. Deep learning of quantum entanglement from incomplete measurements. *Science Advances*, 9(29):eadd7131, 2023.
- [70] Antti Tarvainen and Harri Valpola. Mean teachers are better role models: Weight-averaged consistency targets improve semi-supervised deep learning results. *Advances in neural information processing systems*, 30, 2017.
- [71] Andreas Elben, Jinlong Yu, Guanyu Zhu, Mohammad Hafezi, Frank Pollmann, Peter Zoller, and Benoît Vermersch. Many-body topological invariants from randomized measurements in synthetic quantum matter. *Science advances*, 6(15):eaaz3666, 2020.



- [72] Marko Žnidarič, Tomaž Prosen, and Peter Prelovšek. Many-body localization in the heisenberg xxz magnet in a random field. *Physical Review B—Condensed Matter and Materials Physics*, 77(6):064426, 2008.
- [73] Pietro Smacchia, Luigi Amico, Paolo Facchi, Rosario Fazio, Giuseppe Florio, Saverio Pascazio, and Vlatko Vedral. Statistical mechanics of the cluster ising model. *Physical Review A—Atomic, Molecular, and Optical Physics*, 84(2):022304, 2011.
- [74] Naeimeh Mohseni, Peter L McMahon, and Tim Byrnes. Ising machines as hardware solvers of combinatorial optimization problems. *Nature Reviews Physics*, 4(6):363–379, 2022.
- [75] Fred Glover, Gary Kochenberger, and Yu Du. A tutorial on formulating and using qubo models. *arXiv preprint arXiv:1811.11538*, 2018.
- [76] Kotaro Tanahashi, Shinichi Takayanagi, Tomomitsu Motohashi, and Shu Tanaka. Application of ising machines and a software development for ising machines. *Journal of the Physical Society of Japan*, 88(6):061010, 2019.
- [77] Jules Tilly, Hongxiang Chen, Shuxiang Cao, Dario Picozzi, Kanav Setia, Ying Li, Edward Grant, Leonard Wossnig, Ivan Rungger, George H Booth, et al. The variational quantum eigensolver: a review of methods and best practices. *Physics Reports*, 986:1–128, 2022.
- [78] Edward Farhi, Jeffrey Goldstone, and Sam Gutmann. A quantum approximate optimization algorithm. *arXiv preprint arXiv:1411.4028*, 2014.
- [79] Leo Zhou, Sheng-Tao Wang, Soonwon Choi, Hannes Pichler, and Mikhail D Lukin. Quantum approximate optimization algorithm: Performance, mechanism, and implementation on near-term devices. *Physical Review X*, 10(2):021067, 2020.
- [80] Tameem Albash and Daniel A Lidar. Adiabatic quantum computation. *Reviews of Modern Physics*, 90(1):015002, 2018.
- [81] Andreas Elben, Richard Kueng, Hsin-Yuan Huang, Rick van Bijnen, Christian Kokail, Marcello Dalmonte, Pasquale Calabrese, Barbara Kraus, John Preskill, Peter Zoller, et al. Mixed-state entanglement from local randomized measurements. *Physical Review Letters*, 125(20):200501, 2020.
- [82] Benoît Vermersch, Marko Ljubotina, J Ignacio Cirac, Peter Zoller, Maksym Serbyn, and Lorenzo Piroli. Many-body entropies and entanglement from polynomially many local measurements. *Physical Review X*, 14(3):031035, 2024.
- [83] Yinfei Li, Sanjib Ghosh, Jiangwei Shang, Qihua Xiong, and Xiangdong Zhang. Estimating many properties of a quantum state via quantum reservoir processing. *Physical Review Research*, 6(1):013211, 2024.
- [84] Enrico Fontana, Manuel S Rudolph, Ross Duncan, Ivan Rungger, and Cristina Cîrstoiu. Classical simulations of noisy variational quantum circuits. *arXiv preprint arXiv:2306.05400*, 2023.
- [85] Manuel S Rudolph, Enrico Fontana, Zoë Holmes, and Lukasz Cincio. Classical surrogate simulation of quantum systems with lowesa. *arXiv preprint arXiv:2308.09109*, 2023.
- [86] Armando Angrisani, Alexander Schmidhuber, Manuel S Rudolph, M Cerezo, Zoë Holmes, and Hsin-Yuan Huang. Classically estimating observables of noiseless quantum circuits. *arXiv preprint arXiv:2409.01706*, 2024.
- [87] Guillermo González-García, J Ignacio Cirac, and Rahul Trivedi. Pauli path simulations of noisy quantum circuits beyond average case. *Quantum*, 9:1730, 2025.
- [88] Tomislav Begušić, Kasra Hejazi, and Garnet Kin Chan. Simulating quantum circuit expectation values by clifford perturbation theory. *The Journal of Chemical Physics*, 162(15), 2025.
- [89] Uwe Dorner, Rafal Demkowicz-Dobrzanski, Brian J Smith, Jeff S Lundeen, Wojciech Wasilewski, Konrad Banaszek, and Ian A Walmsley. Optimal quantum phase estimation. *Physical review letters*, 102(4):040403, 2009.

- 594 [90] Youle Wang, Lei Zhang, Zhan Yu, and Xin Wang. Quantum phase processing and its applications  
595 in estimating phase and entropies. *Physical Review A*, 108(6):062413, 2023.
- 596 [91] Hsin-Yuan Huang, Richard Kueng, Giacomo Torlai, Victor V Albert, and John Preskill. Provably  
597 efficient machine learning for quantum many-body problems. *arXiv preprint arXiv:2106.12627*,  
598 2021.
- 599 [92] Xun Gao and Lu-Ming Duan. Efficient representation of quantum many-body states with deep  
600 neural networks. *Nature Communications*, 8(1):662, 2017.
- 601 [93] Ashish Vaswani, Noam Shazeer, Niki Parmar, Jakob Uszkoreit, Llion Jones, Aidan N Gomez,  
602 Łukasz Kaiser, and Illia Polosukhin. Attention is all you need. *Advances in neural information*  
603 *processing systems*, 30, 2017.
- 604 [94] JC Ferreira and VA2501172 Menegatto. Eigenvalues of integral operators defined by smooth  
605 positive definite kernels. *Integral Equations and Operator Theory*, 64(1):61–81, 2009.
- 606 [95] Arthur Jacot, Franck Gabriel, and Clément Hongler. Neural tangent kernel: convergence and  
607 generalization in neural networks. In *Proceedings of the 32nd International Conference on*  
608 *Neural Information Processing Systems*, pages 8580–8589, 2018.
- 609 [96] Giacomo Torlai and Matthew Fishman. PastaQ: A package for simulation, tomography and  
610 analysis of quantum computers, 2020. URL <https://github.com/GTorlai/PastaQ.jl/>.
- 611 [97] Matthew Fishman, Steven R. White, and E. Miles Stoudenmire. The ITensor Software Library  
612 for Tensor Network Calculations. *SciPost Phys. Codebases*, page 4, 2022. doi: 10.21468/  
613 SciPostPhysCodeb.4. URL <https://scipost.org/10.21468/SciPostPhysCodeb.4>.
- 614 [98] A Paszke. Pytorch: An imperative style, high-performance deep learning library. *arXiv preprint*  
615 *arXiv:1912.01703*, 2019.
- 616 [99] Utkarsh Azad and Stepan Fomichev. PennyLane quantum chemistry datasets. [https://](https://pennylane.ai/datasets/h4-molecule)  
617 [pennylane.ai/datasets/h4-molecule](https://pennylane.ai/datasets/h4-molecule), 2023.

## A More basics of quantum computing

This section provides more details about quantum computing and reviews the classical shadow algorithms for quantum properties estimation (QPE), along with their associated sample complexity.

**Basics of quantum computation.** The elementary unit of quantum computation is the qubit (or quantum bit), which is the quantum mechanical analog of a classical bit. A qubit is a two-level quantum-mechanical system described by a unit vector in the Hilbert space  $\mathbb{C}^2$ . In Dirac notation, a qubit state is defined as  $|\phi\rangle = c_0|0\rangle + c_1|1\rangle \in \mathbb{C}^2$  where  $|0\rangle = [1, 0]^T$  and  $|1\rangle = [0, 1]^T$  specify two unit bases and the coefficients  $c_0, c_1 \in \mathbb{C}$  yield  $|c_0|^2 + |c_1|^2 = 1$ . Similarly, the *quantum state* of  $n$  qubits is defined as a unit vector in  $\mathbb{C}^{2^n}$ , i.e.,  $|\psi\rangle = \sum_{j=1}^{2^n} c_j |e_j\rangle$ , where  $|e_j\rangle \in \mathbb{R}^{2^n}$  is the computational basis whose  $j$ -th entry is 1 and other entries are 0, and  $\sum_{j=1}^{2^n} |c_j|^2 = 1$  with  $c_j \in \mathbb{C}$ . Besides Dirac notation, the density matrix can be used to describe more general qubit states. For example, the density matrix of the state  $|\psi\rangle$  is  $\rho = |\psi\rangle\langle\psi| \in \mathbb{C}^{2^n \times 2^n}$ , where  $\langle\psi| = |\psi\rangle^\dagger$  refers to the complex conjugate transpose of  $|\psi\rangle$ . For a set of qubit states  $\{p_j, |\psi_j\rangle\}_{j=1}^m$  with  $p_j > 0$ ,  $\sum_{j=1}^m p_j = 1$ , and  $|\psi_j\rangle \in \mathbb{C}^{2^n}$  for  $j \in [m]$ , its density matrix is  $\rho = \sum_{j=1}^m p_j \rho_j$  with  $\rho_j = |\psi_j\rangle\langle\psi_j|$  and  $\text{Tr}(\rho) = 1$ .

A *quantum gate* is a unitary operator that can evolve a quantum state  $\rho$  to another quantum state  $\rho'$ . Namely, an  $n$ -qubit gate  $U \in \mathcal{U}(2^n)$  obeys  $UU^\dagger = U^\dagger U = I_{2^n}$ , where  $\mathcal{U}(2^n)$  refers to the unitary group in dimension  $2^n$ . Typical single-qubit quantum gates include the Pauli gates, which can be written as Pauli matrices:

$$X = \begin{bmatrix} 0 & 1 \\ 1 & 0 \end{bmatrix}, \quad Y = \begin{bmatrix} 0 & -i \\ i & 0 \end{bmatrix}, \quad Z = \begin{bmatrix} 1 & 0 \\ 0 & -1 \end{bmatrix}. \quad (11)$$

The more general quantum gates are their corresponding rotation gates  $R_X(\theta) = e^{-i\frac{\theta}{2}X}$ ,  $R_Y(\theta) = e^{-i\frac{\theta}{2}Y}$ , and  $R_Z(\theta) = e^{-i\frac{\theta}{2}Z}$  with a tunable parameter  $\theta$ , which can be written in the matrix form as

$$R_X(\theta) = \begin{bmatrix} \cos \frac{\theta}{2} & -i \sin \frac{\theta}{2} \\ -i \sin \frac{\theta}{2} & \cos \frac{\theta}{2} \end{bmatrix}, \quad R_Y(\theta) = \begin{bmatrix} \cos \frac{\theta}{2} & -\sin \frac{\theta}{2} \\ \sin \frac{\theta}{2} & \cos \frac{\theta}{2} \end{bmatrix}, \quad R_Z(\theta) = \begin{bmatrix} e^{-i\frac{\theta}{2}} & 0 \\ 0 & e^{i\frac{\theta}{2}} \end{bmatrix}. \quad (12)$$

They are equivalent to rotating a tunable angle  $\theta$  around  $x$ ,  $y$ , and  $z$  axes of the Bloch sphere, and recovering the Pauli gates  $X$ ,  $Y$ , and  $Z$  when  $\theta = \pi$ . Moreover, a multi-qubit gate can be either an individual gate (e.g., CNOT gate) or a tensor product of multiple single-qubit gates.

The *quantum measurement* refers to the procedure of extracting classical information from the quantum state. It is mathematically specified by a Hermitian matrix  $H$  called the *observable*. Applying the observable  $H$  to the quantum state  $|\psi\rangle$  yields a random variable whose expectation value is  $\langle\psi|H|\psi\rangle$ .

**Hamiltonian and ground state.** In quantum computation, a *Hamiltonian* is a Hermitian matrix that is used to characterize the evolution of a quantum system or as an observable to extract the classical information from the quantum system. Specifically, under the Schrödinger equation, a quantum gate has the mathematical form of  $U = e^{-itH}$ , where  $H$  is a Hermitian matrix, called the Hamiltonian of the quantum system, and  $t$  refers to the evolution time of the Hamiltonian. Typical single-qubit Hamiltonians include the Pauli matrices defined in Eqn. (11). As a result, the evolution time  $t$  refers to the tunable parameter  $\theta$  in Eqn. (12). Any single-qubit Hamiltonian can be decomposed as the linear combination of Pauli matrices, i.e.,  $H = a_1I + a_2X + a_3Y + a_4Z$  with  $a_j \in \mathbb{C}$ . In the same way, a multi-qubit Hamiltonian is denoted by  $H = \sum_{j=1}^{4^n} a_j P_j$ , where  $P_j \in \{I, X, Y, Z\}^{\otimes n}$  is the tensor product of Pauli matrices. In quantum chemistry and quantum many-body physics, the Hermitian matrix that describes the quantum system to be solved is denoted as the *problem Hamiltonian*  $H_C$ .

When taking the problem Hamiltonian as the observable, the quantum state  $|\psi^*\rangle$  is said to be the *ground state* of problem Hamiltonian  $H$  if the expectation value  $\langle\psi^*|H|\psi^*\rangle$  takes the minimum eigenvalue of  $H$ , which is called the *ground energy*. The ground states encode much essential information about the problem Hamiltonian, such as the critical behavior of quantum many-body systems, or the optimal solution of an optimization problem related to the problem Hamiltonian.

Numerous classical and quantum algorithms have been developed to efficiently obtain the ground states of problem Hamiltonians. These algorithms leverage various techniques, including variational

664 methods, quantum annealing, and the application of tensor networks, to approximate or directly  
 665 compute the ground state. In particular, quantum algorithms such as the variational quantum  
 666 eigensolver [77], quantum approximate optimization algorithm [78, 79], and the adiabatic quantum  
 667 algorithm [80] show promising results for solving combinatorial optimization problems by preparing  
 668 and measuring the ground state of problem Hamiltonians. The efficiency and feasibility of these  
 669 methods continue to be the subject of extensive research, particularly in the context of near-term  
 670 quantum devices.

671 **Classical shadow for QPE.** We review the classical shadow algorithm [13] and the sample complexity  
 672 for estimating the linear and nonlinear properties of quantum states. Given a unitary operator  $U$   
 673 sampled from a unitary ensemble  $\mathcal{U}$ , and the subsequent measurement outcome  $\mathbf{b}$  under computational  
 674 measurement, the classical shadow of the  $N$ -qubit quantum state  $\rho$  from  $m$  snapshots refers to

$$\hat{\rho} = \frac{1}{m} \sum_{j=1}^m \bigotimes_{i=1}^N (3U_j^{(i)\dagger} |\mathbf{b}_j^{(i)}\rangle \langle \mathbf{b}_j^{(i)}| U_j^{(i)} - I_2), \quad (13)$$

675 where random unitaries  $U_j^{(i)}$  are sampled from the Pauli ensembles  $\mathcal{U} = \{I_2, X, Y, Z\}^{\otimes n} \setminus I_2^{\otimes n}$ . It has  
 676 been shown that the sample complexity for estimating the expectation of observables  $O$  to  $\epsilon$ -precision  
 677 is  $\mathcal{O}(4^{\text{locality}(O)} \|O\|_\infty^2 / \epsilon^2)$ , with  $\text{locality}(O)$  representing the number of non-identity operators acting  
 678 on the qubits. For two-point correlation, the observable refers to  $O = \sigma_i^x \sigma_j^x$  acting on the  $i$ -th and  
 679  $j$ -th qubits with  $\text{locality}(O) = 2$ , leading to the sample complexity  $\mathcal{O}(16/\epsilon^2)$  for QPE.

680 The classical shadow could also be used to estimate the entanglement entropy of the quantum state  $\rho$   
 681 on the subsystem  $A$ , which is given by

$$\hat{S}_A(\rho) = -\log_2 \hat{\mathcal{P}}(\rho_A), \quad \text{with } \hat{\mathcal{P}}(\rho) = \frac{1}{m(m-1)} \sum_{j \neq j'} \text{Tr}(\hat{\rho}_A^{(j)}) \hat{\rho}_A^{(j')}, \quad (14)$$

682 where  $\hat{\mathcal{P}}(\rho_A)$  refers to the purity estimation of  $\text{Tr}(\rho_A^2)$ ,  $\hat{\rho}_A^{(j)} = \bigotimes_{i \in A} (3U_j^{(i)\dagger} |\mathbf{b}_j^{(i)}\rangle \langle \mathbf{b}_j^{(i)}| U_j^{(i)} - I_2)$   
 683 refers to the local classical shadow on subsystems  $A$  obtained from the  $j$ -th snapshot. It has been  
 684 shown that the statistical error associated with  $\hat{\mathcal{P}}(\rho_A)$  is quantified by its variance, which can be  
 685 bounded as follows [81, 82],

$$\text{Var}(\hat{\mathcal{P}}(\rho_A)) \leq 4 \left( \frac{2^{|A|} \hat{\mathcal{P}}(\rho_A)}{m} \right) + 2 \left( \frac{2^{2|A|}}{m-1} \right)^2, \quad (15)$$

686 where  $|A|$  denotes the number of qubits in  $A$ . This bound is known to be essentially optimal  
 687 [81]. It implies that estimating the entanglement entropy requires an exponentially large number of  
 688 measurements as the size of subsystem  $A$  increases.

## 689 B Related work

690 In this section, we present a concise review of the literature on quantum property estimation (QPE),  
 691 categorizing the approaches into three primary paradigms: conventional algorithms, machine learning  
 692 (ML) algorithms, and deep learning (DL) algorithms. Our discussion emphasizes that the proposed  
 693 AiDE-Q framework can be seamlessly integrated with various ML and DL algorithms.

694 **Conventional algorithms for QPE.** Conventional algorithms primarily focus on estimating the  
 695 quantum properties of individual quantum states. A wide range of methods have been proposed,  
 696 spanning classical simulation algorithms, quantum algorithms, and quantum state learning (QSL)  
 697 algorithms [83].

698 Classical simulation algorithms achieve QPE entirely on classical computers, often utilizing tensor  
 699 network techniques to simulate the whole quantum state [7–11], or employing Pauli-path simulation  
 700 methods to estimate properties of quantum circuit generated states [84–88]. However, these classical  
 701 simulation algorithms are typically limited to specific types of quantum states, such as low-entangled  
 702 or low-magic states. Quantum algorithms for QPE involve the implementation of well-designed  
 703 quantum circuits to evolve quantum states and extract the desired properties. Despite their potential,  
 704 these quantum algorithms often require substantial quantum resources to construct the circuits, which  
 705 can hinder their practical application, especially in the early stages of quantum computing [89, 90].

Quantum state learning (QSL) algorithms for QPE operate by performing multiple measurements on a quantum state and post-processing the measurement results to estimate the quantum properties of interest [13, 20, 16, 81, 82]. Among these, the classical shadow algorithm has emerged as one of the most popular and efficient approaches, offering rigorous theoretical guarantees [13]. By using the measurement outputs from random measurement operators, this algorithm can simultaneously estimate multiple properties of quantum states, making it one of the most resource-efficient conventional algorithms for QPE.

**ML algorithms for QPE.** Unlike conventional algorithms that focus on QPE of individual states, machine learning algorithms address the QPE problem for classes of quantum states originating from the same quantum many-body systems with varying physical parameters. Notably, Huang et al. [91] proposed a kernel-based learning model that efficiently predicts linear properties of quantum many-body states with rigorous theoretical guarantees. This method eliminates the need for quantum devices during the prediction phase. Furthermore, Lewis et al. [36] introduced a Lasso regression model for  $N$ -qubit gapped local Hamiltonians that improves sample complexity from polynomial scaling  $N^c$  (where  $c$  is a constant) achieved in Ref. [91] to logarithmic scaling  $\log(N)$ .

**DL algorithms for QPE.** Deep learning algorithms provide enhanced capability for recognizing complex patterns in classical data collected from quantum many-body systems, enabling predictions of complex properties such as entanglement entropy with improved accuracy. Current DL algorithms can be categorized into three primary learning paradigms: supervised learning (SL), semi-supervised learning (SSL), and self-supervised learning with fine-tuning (SSL-FT).

The supervised learning paradigm explores various neural architectures for effectively constructing classical representations of the quantum states, including restricted Boltzmann machines [26, 28, 92], multi-layer perceptions [39, 40, 47], convolutional neural networks [29, 42, 46], and attention-based neural networks [35, 41, 48, 49]. The parameterized neural network for state restriction is optimized to approximate the target values of quantum properties in the training dataset under specific loss functions, such as mean square loss or cross-entropy loss.

The SSL and SSL-FT paradigms address the challenge of limited labeled data, allowing training with datasets comprising both labeled and unlabeled data. Tang et al. proposed a teacher-student model for semi-supervised training [50] and a large language model-style quantum task-agnostic pretraining and fine-tuning paradigm [51]. Both paradigms incorporate SL approaches for the labeled dataset, but differ in their sequence: SSL applies supervised learning before training with unlabeled data, whereas SSL-FT employs supervised fine-tuning after the self-supervised pretraining stage, which will be detailed in Appendix C.

## C Implementation details of various learning paradigms for QPE

In this section, we present the implementation details of the three learning paradigms employed in the experiments: supervised learning (SL), semi-supervised learning (SSL), and self-supervised learning with fine-tuning (SSL-FT). All paradigms share a common neural network architecture comprising three main components: the input (encoding) layer, the hidden layer, and the output layer. To ensure a fair comparison of model performance, we adopt an identical architecture for the input and hidden layers across all learning paradigms, while the output layer is customized to suit the specific requirements of each paradigm.

### C.1 Input layer and hidden layer

We follow the attention-based neural architecture proposed in Ref. [51] to design the input and hidden layers for representing quantum states.

**Input layer.** To capture the hidden patterns of the quantum system, the input layer incorporates three types of embeddings: token embeddings, condition embeddings, and position embeddings.

Each measurement outcome  $\mathbf{o}_j \in \{0, 1\}$  under the corresponding Pauli measurement  $M_j \in \{X, Y, Z\}$  on the  $j$ -th qubit yields six possible combinations:  $(X, 0)$ ,  $(X, 1)$ ,  $(Y, 0)$ ,  $(Y, 1)$ ,  $(Z, 0)$ , and  $(Z, 1)$ . These pairs can be bijectively mapped to integers  $\sigma \in [6]$ . Consequently, the measurement outcomes  $(M, \mathbf{o})$  can be represented as a tokenized measurement string  $\sigma(M, \mathbf{o})$ , where each element  $\sigma(M_i, \mathbf{o}_i) \in [6]$  resembles a token in natural language processing (NLP). The token



embedding layer applies a linear transformation to the measurement string, augmented with a start token  $s$ , producing a feature tensor  $\mathbf{E}_t \in \mathbb{R}^{B_t \times (N+1) \times d}$ , where  $B_t$  denotes the batch size and  $d$  is the feature dimension. A feed-forward network (FFN) with one hidden layer is then used to embed the physical condition  $\mathbf{p}$  into a vector  $\mathbf{E}_c \in \mathbb{R}^{B_t \times d}$ . The final input embedding is computed as the element-wise sum

$$\mathbf{E}_{\text{out}} = \mathbf{E}_t + \mathbf{E}_c + \mathbf{E}_p,$$

where  $\mathbf{E}_p$  denotes the position embeddings, as described in Ref. [93]. The resulting tensor  $\mathbf{E}_{\text{out}}$  is passed to the hidden layers for further processing.

**Hidden Layer.** The hidden layer consists of a multi-layer Transformer decoder, following the architecture of Ref. [93]. It takes  $\mathbf{E}_{\text{out}}$  as input and produces output  $\mathbf{F} \in \mathbb{R}^{B_t \times (N+1) \times d}$ , which encodes high-level representations of both the measurement strings and the conditional physical parameters. For additional architectural details, refer to Ref. [51].

## C.2 Output Layer and loss function

We now separately describe the neural architectures of the output layer and the associated loss functions under the explored three learning paradigms. Specifically, the design of the output layer is tailored to accommodate the specific loss function used in each paradigm.

**SL paradigms.** Recall that in the SL paradigm, the training dataset for a batch is given by  $\mathcal{S}_{\text{SL}} = \{(\mathbf{x}^{(i)}, \mathbf{y}^{(i)})\}_{i=1}^{B_t}$ , where each input  $\mathbf{x}^{(i)} = (\mathbf{p}^{(i)}, \mathbf{M}^{(i)}, \mathbf{o}^{(i)})$  is derived from quantum states  $\rho(\mathbf{p}^{(i)})$  with different parameters  $\mathbf{p}^{(i)}$ , and  $\mathbf{y}^{(i)} \in \mathbb{R}^K$  represents the target label vector of dimension  $K$ . The loss function for a training batch is defined as

$$\mathcal{L}_{\text{SL}} = \frac{1}{B_t} \sum_{i=1}^{B_t} \left\| f_{\text{SL}}(\mathbf{x}^{(i)}) - \mathbf{y}^{(i)} \right\|^2. \quad (16)$$

To support this loss function, the output of the neural network for each input  $\mathbf{x}^{(i)}$  must be a  $K$ -dimensional vector. Accordingly, the output layer consists of a feature aggregation module followed by a linear projection. Specifically, hidden features  $\mathbf{F} \in \mathbb{R}^{B_t \times (N+1) \times d}$  are aggregated along the second axis to produce a feature representation  $\mathbf{F}' \in \mathbb{R}^{B_t \times d}$  for each training example. This is followed by a linear projection into  $\mathbf{F}'' \in \mathbb{R}^{B_t \times K}$ , with an optional task-specific activation function. For instance, a tanh activation is used when predicting correlation functions.

**SSL paradigms.** In the SSL setting, the training dataset includes both labeled and unlabeled data, denoted by  $\mathcal{S}_{\text{SSL}} = \{(\mathbf{x}^{(i)}, \mathbf{y}^{(i)})\}_{i=1}^{n_l} \cup \{\mathbf{x}^{(i)}\}_{i=n_l+1}^n$ , where  $n_l$  is the number of labeled samples. A teacher-student framework [70] is adopted, consisting of a student model  $f_{\text{SSL}}$  and a teacher model  $f'_{\text{SSL}}$ , both sharing the same architecture. The loss function for the student model in a given batch yields

$$\mathcal{L}_{\text{SSL}} = \frac{1}{B_l} \sum_{i=1}^{B_l} \left\| f_{\text{SSL}}(\mathbf{x}^{(i)}) - \mathbf{y}^{(i)} \right\|^2 + \frac{\lambda}{B_t - B_l} \sum_{i=B_l+1}^{B_t} \left\| f_{\text{SSL}}(\mathbf{x}^{(i)}) - f'_{\text{SSL}}(\mathbf{x}^{(i)}) \right\|^2, \quad (17)$$

where  $\lambda$  refers to the consistency weight,  $B_l$  is the number of labeled samples in the batch, and  $B_t$  is the total batch size. The proportion of labeled samples per batch is kept consistent with their proportion in the overall training dataset, i.e.,  $B_l/B_t = n_l/n$ . The teacher model's parameters are updated as an exponential moving average of the student model's parameters, following the approach in Ref. [70].

Since the outputs of the DL models in the SSL paradigm play the same role of  $K$ -dimensional predicted labels as that in the SL paradigm, the architectures of the teacher and student networks are designed identically to the ones used in the SL setting.

**SSL-FT paradigms.** The SSL-FT paradigm adopts a two-stage training procedure. In the first stage, a self-supervised pretraining is performed using the unlabeled dataset  $\{\mathbf{x} = (\mathbf{p}, \mathbf{M}, \mathbf{o})\}$ , where the goal is to model the classical probability distribution  $\mathbb{P}(\boldsymbol{\sigma}(\mathbf{M}_1, \mathbf{o}_1), \dots, \boldsymbol{\sigma}(\mathbf{M}_N, \mathbf{o}_N))$  associated with a quantum state  $\rho(\mathbf{p})$  with fixed parameters  $\mathbf{p}$ . This is achieved by minimizing the average negative log-likelihood loss

$$\mathcal{L}_{\text{SF}} = \frac{1}{B_t - B_l} \sum_{i=1}^{B_t - B_l} -\log \mathbb{P} \left( \boldsymbol{\sigma}(\mathbf{M}_1^{(i)}, \mathbf{o}_1^{(i)}), \dots, \boldsymbol{\sigma}(\mathbf{M}_N^{(i)}, \mathbf{o}_N^{(i)}) \mid \mathbf{p}^{(i)} \right), \quad (18)$$

800 which corresponds to maximizing the conditional likelihood of observed measurement outcomes.

801 To produce valid probability distributions, the output layer consists of a linear transformation followed  
802 by a softmax activation, ensuring normalization

$$\sum_{(\mathbf{M}_1, \mathbf{o}_1)} \cdots \sum_{(\mathbf{M}_N, \mathbf{o}_N)} \mathbb{P}(\boldsymbol{\sigma}(\mathbf{M}_1, \mathbf{o}_1), \cdots, \boldsymbol{\sigma}(\mathbf{M}_N, \mathbf{o}_N)) = 1.$$

803 In the second stage, the pretrained model is fine-tuned on the labeled dataset  $\{(\mathbf{x}, \mathbf{y})\}$  using the same  
804 supervised loss and output layer design as in the SL paradigm, namely

$$\mathcal{L}_{\text{FT}} = \frac{1}{B_t} \sum_{i=1}^{B_t} \left\| f_{\text{SF}}(\mathbf{x}^{(i)}) - \mathbf{y}^{(i)} \right\|^2, \quad (19)$$

805 where the initial parameters of the input and hidden layers of  $f_{\text{SF}}$  inherit the optimized parameters  
806 during the pretraining stage.

## 807 D Integration of AiDE-Q with machine learning models

808 In this section, we briefly review the machine learning (ML) models for QPE [36, 91], and relate  
809 them to the supervised learning (ML) paradigm. In this regard, the integration of ML models with  
810 AiDE-Q could follow the same manner as that in the SL paradigm introduced in the main text.

811 We follow the conventions of Ref. [91] to introduce the ML model for QPE. In particular, the  
812 ML model considers the training dataset  $\{(\mathbf{p}^{(i)}, \hat{\rho}(\mathbf{p}^{(i)}))\}_{i=1}^n$ , where  $\mathbf{p}^{(i)}$  are the sampled physical  
813 parameters, and  $\hat{\rho}(\mathbf{p}^{(i)})$  refer to the classical shadow constructed with  $(\mathbf{M}, \mathbf{o})$ , as defined in Eq. 13.  
814 The classical ML models are trained on the size- $n$  training data, such that when given the input  
815  $\mathbf{p}^{(i)}$ , the ML model can produce a classical representation  $h(\mathbf{p}^{(i)})$  that approximates  $\hat{\rho}(\mathbf{p}^{(i)})$ . During  
816 prediction, the classical ML produces  $h(\mathbf{p})$  for new values of  $\mathbf{p}$  different from those in the training  
817 data. In particular, the predicted output of the trained classical ML models can be written as the  
818 extrapolation of the training data using a learned kernel  $\kappa(\mathbf{p}, \mathbf{p}^{(i)}) \in \mathbb{R}$ ,

$$h(\mathbf{p}) = \frac{1}{n} \sum_{i=1}^n \kappa(\mathbf{p}, \mathbf{p}^{(i)}) \hat{\rho}(\mathbf{p}^{(i)}). \quad (20)$$

819 The ground state properties are then estimated using these predicted classical representations  $h(\mathbf{p})$ .  
820 Specifically,  $f_{\text{ML}}(\rho) = \text{tr}(O h(\mathbf{p}))$  can be predicted efficiently whenever  $O$  is a sum of few-body  
821 operators. In this regard, the trained classical ML for specific properties  $\hat{\mathbf{y}}^{(i)} = \text{tr}(O \hat{\rho}(\mathbf{p}^{(i)}))$  could  
822 be written as

$$f_{\text{ML}}(\mathbf{p}) = \frac{1}{n} \sum_{i=1}^n \kappa(\mathbf{p}, \mathbf{p}^{(i)}) \hat{\mathbf{y}}^{(i)}. \quad (21)$$

823 Notably, the kernel function could be represented as the inner product of two feature vectors  $\Phi(\mathbf{p})$   
824 and  $\Phi(\mathbf{p}^{(i)})$  according to Mercer's theorem [94]. In this regard, the learning model  $f_{\text{ML}}(\mathbf{p})$  relates to  
825 the optimal solution of the following supervised learning problem

$$f_{\text{ML}}(\mathbf{p}) = \arg \min_{f(\mathbf{p}) = \boldsymbol{\omega} \cdot \Phi(\mathbf{p})} \mathcal{L}_{\text{ML}}(\boldsymbol{\omega}) := \arg \min_{f(\mathbf{p}) = \boldsymbol{\omega} \cdot \Phi(\mathbf{p})} \frac{1}{n} \sum_{i=1}^n \left( f(\mathbf{p}^{(i)}) - \hat{\mathbf{y}}^{(i)} \right)^2, \quad (22)$$

826 where  $\boldsymbol{\omega}$  refers to the optimized parameters. For neural tangent kernel  $\kappa(\mathbf{p}, \mathbf{p}^{(i)})$  [37], the feature  
827 vector  $\Phi(\mathbf{p})$  corresponds to the output of a deep neural network with large hidden layers [95].

828 To summarize, the ML models used in QPE naturally fit within the supervised learning paradigm  
829 described in Appendix C. Consequently, integrating these ML models with AiDE-Q can proceed in  
830 the same manner as outlined for the SL paradigm in the main text.

## 831 E Experimental setting and more experimental results

### 832 E.1 Experimental setting

833 **Hardware platform.** All the generation of training datasets are implemented by PastaQ [96] and  
834 ITensors [97] in the Julia language and run on classical device with Intel(R) Xeon(R) Gold 6226R

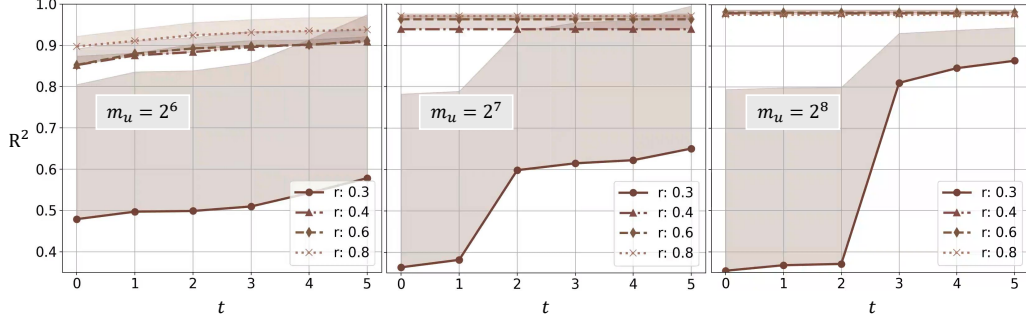

Figure 5:  $R^2$  in entanglement entropy prediction for the 50-qubit Heisenberg XXZ model without using the physical parameters for constructing the training dataset. The panels from left to right correspond to the prediction performance for the number of measurements  $m_u \in \{2^6, 2^7, 2^8\}$ .

CPU @ 2.90GHz and 256 GB memory. All deep learning models in various learning paradigms are implemented by Pytorch [98] and are trained on a single NVIDIA GeForce RTX 3090 with 24G graphics memory.

**Hyperparameter setting.** The deep learning (DL) models use the attention-based neural architectures described in Appendix C. The embedding dimension is set to  $d = 128$ , the number of attention heads is set to 4, and the number of hidden layers is set to  $L = 2$ . We optimize the DL model using the ADAM optimizer with a learning rate of  $l = 10^{-3}$  and a batch size of  $B_t = 64$ . The maximum number of training epochs is set to 300. To mitigate overfitting, we employ an early stopping strategy. During the initial training stage, early stopping is applied after 100 epochs. In the subsequent training stage, with the updated high-quality dataset, early stopping is initiated after 30 epochs. Each configuration is run 5 times to report the average prediction performance.

## E.2 More experimental results for the Heisenberg XXZ model

In this section, we examine the prediction performance of the deep learning (DL) model trained on a dataset that does not include physical parameters as input. Specifically, instead of using the training dataset with inputs  $\mathbf{x}(\mathbf{p}^{(i)}) = (\mathbf{p}^{(i)}, \mathbf{o}^{(i)}, \mathbf{M}^{(i)})$  as defined in Eq.(2), we construct the dataset with inputs  $\mathbf{x}^{(i)} = (\mathbf{o}^{(i)}, \mathbf{M}^{(i)})$ , where the physical parameters  $\mathbf{p}^{(i)}$  are assumed to be unknown during the training process. The experimental results for predicting the entanglement entropy of the 50-qubit Heisenberg XXZ model are presented in Fig. 5. It is observed that the prediction performance can be consistently improved by AiDE-Q when the dataset contains a small ratio of high-quality data. For instance, with a large number of measurements ( $m_u = 2^8$ ) or low-quality data and a small ratio of high-quality data ( $r = 0.3$ ), the coefficient of determination  $R^2$  improves from approximately 0.36 to 0.88. These experimental results demonstrate the effectiveness of AiDE-Q for handling various types of training data.

## E.3 More experimental results for the cluster-Ising model

In this section, we present additional experimental results for the 9-qubit cluster Ising model, following the same format as the Heisenberg XXZ model results discussed in the main text. The hyperparameter settings used to construct the training dataset are consistent with those described in the main text.

**Supervised learning models integrated with AiDE-Q outperform all reference models.** Table 3 presents the coefficient of determination  $R^2$  for predicting entanglement entropy and two-point correlations in the 9-qubit cluster Ising model. The results show similar trends to those observed for the Heisenberg XXZ model, where the baseline SL model integrated with AiDE-Q achieves a significant performance improvement compared to the standalone SL model, outperforming all reference learning models across different properties and various ratio settings. Additionally, when the ratio of high-quality data is large  $r = 0.8$ , the baseline SL model even surpasses the advanced SSL4Q and LLM4QPE models in predicting entanglement entropy. This suggests that directly training DL models with low-quality data can harm prediction performance, even when using advanced

Table 3:  $R^2$  in predicting the entanglement entropy  $S_A$ , two-point correlations  $C_{1j}^x$  and  $C_{1j}^z$  of 9-qubit cluster Ising model, where  $A = [j]$  and  $j \in [N - 1]$ . The number of measurements for low-quality data is set as  $m_u = 2^6$ . The best results are emphasized in blue while the second-best results are distinguished in orange.

| Method   | $S_A$     |           |           | $C_{1j}^x$ |           |           | $C_{1j}^z$ |           |           |
|----------|-----------|-----------|-----------|------------|-----------|-----------|------------|-----------|-----------|
|          | $r = 0.4$ | $r = 0.6$ | $r = 0.8$ | $r = 0.4$  | $r = 0.6$ | $r = 0.8$ | $r = 0.4$  | $r = 0.6$ | $r = 0.8$ |
| SL       | 0.226     | 0.356     | 0.51      | 0.902      | 0.928     | 0.938     | 0.903      | 0.925     | 0.958     |
| SSL4Q    | 0.422     | 0.448     | 0.489     | 0.948      | 0.932     | 0.952     | 0.958      | 0.964     | 0.952     |
| LLM4QPE  | 0.29      | 0.322     | 0.436     | 0.902      | 0.922     | 0.949     | 0.909      | 0.948     | 0.954     |
| NTK      | -         | -         | -         | 0.962      | 0.966     | 0.97      | 0.291      | 0.31      | 0.341     |
| CS       | -         | -         | -         | 0.829      | 0.829     | 0.829     | 0.         | 0.        | 0.        |
| SL w. DE | 0.563     | 0.791     | 0.873     | 0.956      | 0.965     | 0.976     | 0.965      | 0.98      | 0.984     |

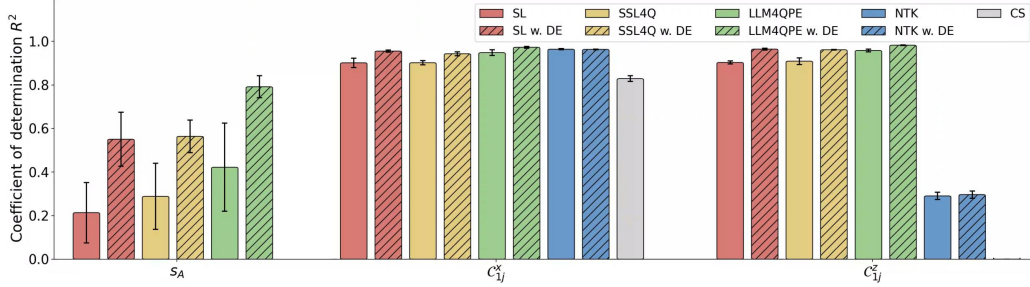

Figure 6:  $R^2$  of reference models with and without integrating AiDE-Q in predicting entanglement entropy  $S_A$ , two-point correlations  $C_{1j}^x$  and  $C_{1j}^z$  of 9-qubit cluster Ising model, where  $A = [j]$  and  $j \in [N - 1]$ . The initial ratio of high-quality data and the number of measurements for low-quality data is set as  $r = 0.4$  and  $m_u = 2^6$ .

learning models. In contrast, the AiDE-Q-enhanced SL model, trained with the identified high-quality synthetic labeled data, significantly improves the best  $R^2$  value across the reference models from 0.51 to 0.873. These results emphasize the importance of constructing high-quality synthetic labeled data when training DL models for quantum property estimation.

**AiDE-Q enhances the prediction performance of various DL-based models.** Fig. 6 presents numerical results of predicting quantum properties when integrating AiDE-Q into various learning models. The ratio of high-quality data is set to  $r = 0.4$ , and the number of measurements for low-quality data is  $m_u = 2^6$ . The results show that all learning models exhibit an improvement in  $R^2$  after incorporating AiDE-Q into their baseline models, particularly in predicting the complex non-linear properties of entanglement entropy.

#### E.4 Experimental results for the chemical molecular model

We conduct numerical simulations for predicting the properties of chemical molecular models, focusing on the  $H_4$  molecule with varied inter-atomic length.

**Dataset Generation.** The Hamiltonian of a molecular system under Jordan-Wigner transformation is given by

$$H(\mathbf{p}) = \sum_{i=1}^N \sum_{\alpha \in \{x,y,z\}} c_i^\alpha(\mathbf{p}) \sigma_i^\alpha + \sum_{i,j=1}^N \sum_{\alpha,\beta \in \{x,y,z\}} c_{i,j}^{(\alpha,\beta)}(\mathbf{p}) \sigma_i^\alpha \sigma_j^\beta, \quad (23)$$

where  $\sigma_i^z$  ( $\sigma_i^x$ ) is the Pauli-Z (Pauli-X) operator acting on the  $i$ -th qubit,  $c_i^\alpha(\mathbf{p})$ ,  $c_{i,j}^{(\alpha,\beta)}(\mathbf{p})$  refer to the Pauli coefficients dependent on the inter-atomic length  $\mathbf{p}$ . This Hamiltonian could be constructed with the PennyLane package [99]. For the  $H_4$  molecule, this system is characterized by an 8-qubit Hamiltonian  $H(\mathbf{p})$ . Here, the inter-atomic length  $\mathbf{p}$  is sampled from the range  $0.7\text{\AA}$  to  $1.3\text{\AA}$ . The number of sampled inter-atomic lengths is set as  $n = 1280$ . Other hyperparameters used to build the hybrid dataset in Eq. (5) are set to be the same as those used in quantum many-body systems.

**Experimental results.** Table 4 shows the coefficient of determination  $R^2$  of entanglement entropy prediction for the  $H_4$  molecule model. The results demonstrate that integrating AiDE-Q into various

Table 4:  $R^2$  in predicting the entanglement entropy  $S_A$  of  $H_4$  molecular systems with  $A = [j]$  and  $j \in [N - 1]$ . The best results are emphasized in blue while the second-best results are distinguished in orange.

| Method        | $m_u = 2^6$ |           |           | $m_u = 2^7$ |           |           | $m_u = 2^8$ |           |           |
|---------------|-------------|-----------|-----------|-------------|-----------|-----------|-------------|-----------|-----------|
|               | $r = 0.4$   | $r = 0.6$ | $r = 0.8$ | $r = 0.4$   | $r = 0.6$ | $r = 0.8$ | $r = 0.4$   | $r = 0.6$ | $r = 0.8$ |
| SL            | 0.085       | 0.178     | 0.178     | 0.196       | 0.254     | 0.275     | 0.127       | 0.167     | 0.225     |
| SSL4Q         | 0.251       | 0.109     | 0.404     | 0.203       | 0.224     | 0.408     | 0.082       | 0.165     | 0.305     |
| LLM4QPE       | 0.033       | 0.204     | 0.238     | 0.098       | 0.144     | 0.205     | 0.077       | 0.186     | 0.243     |
| SL w. DE      | 0.405       | 0.619     | 0.679     | 0.478       | 0.638     | 0.734     | 0.5         | 0.632     | 0.751     |
| SSL4Q w. DE   | 0.495       | 0.508     | 0.709     | 0.507       | 0.546     | 0.704     | 0.543       | 0.57      | 0.694     |
| LLM4QPE w. DE | 0.293       | 0.58      | 0.618     | 0.473       | 0.572     | 0.638     | 0.502       | 0.584     | 0.64      |

learning-based models significantly enhances their predictive performance across different ratios of high-quality data  $r \in \{0.4, 0.6, 0.8\}$  and measurement counts  $m_u \in \{2^6, 2^7, 2^8\}$ . In particular, the mean  $R^2$  values for the SL, SSL4Q, and LLM4QPE models are improved from 0.187, 0.239, 0.158 to 0.604, 0.586, 0.544, respectively, after integrating AiDE-Q. These results confirm the effectiveness of AiDE-Q in enhancing the prediction ability of DL models for a variety of quantum systems.



## NeurIPS Paper Checklist

### 1. Claims

Question: Do the main claims made in the abstract and introduction accurately reflect the paper's contributions and scope?

Answer: [\[Yes\]](#)

Justification: Sec. [1](#)

Guidelines:

- The answer NA means that the abstract and introduction do not include the claims made in the paper.
- The abstract and/or introduction should clearly state the claims made, including the contributions made in the paper and important assumptions and limitations. A No or NA answer to this question will not be perceived well by the reviewers.
- The claims made should match theoretical and experimental results, and reflect how much the results can be expected to generalize to other settings.
- It is fine to include aspirational goals as motivation as long as it is clear that these goals are not attained by the paper.

### 2. Limitations

Question: Does the paper discuss the limitations of the work performed by the authors?

Answer: [\[Yes\]](#)

Justification: Sec. [5](#)

Guidelines:

- The answer NA means that the paper has no limitation while the answer No means that the paper has limitations, but those are not discussed in the paper.
- The authors are encouraged to create a separate "Limitations" section in their paper.
- The paper should point out any strong assumptions and how robust the results are to violations of these assumptions (e.g., independence assumptions, noiseless settings, model well-specification, asymptotic approximations only holding locally). The authors should reflect on how these assumptions might be violated in practice and what the implications would be.
- The authors should reflect on the scope of the claims made, e.g., if the approach was only tested on a few datasets or with a few runs. In general, empirical results often depend on implicit assumptions, which should be articulated.
- The authors should reflect on the factors that influence the performance of the approach. For example, a facial recognition algorithm may perform poorly when image resolution is low or images are taken in low lighting. Or a speech-to-text system might not be used reliably to provide closed captions for online lectures because it fails to handle technical jargon.
- The authors should discuss the computational efficiency of the proposed algorithms and how they scale with dataset size.
- If applicable, the authors should discuss possible limitations of their approach to address problems of privacy and fairness.
- While the authors might fear that complete honesty about limitations might be used by reviewers as grounds for rejection, a worse outcome might be that reviewers discover limitations that aren't acknowledged in the paper. The authors should use their best judgment and recognize that individual actions in favor of transparency play an important role in developing norms that preserve the integrity of the community. Reviewers will be specifically instructed to not penalize honesty concerning limitations.

### 3. Theory assumptions and proofs

Question: For each theoretical result, does the paper provide the full set of assumptions and a complete (and correct) proof?

Answer: [\[NA\]](#)

Justification:

Guidelines:

- The answer NA means that the paper does not include theoretical results.
- All the theorems, formulas, and proofs in the paper should be numbered and cross-referenced.
- All assumptions should be clearly stated or referenced in the statement of any theorems.
- The proofs can either appear in the main paper or the supplemental material, but if they appear in the supplemental material, the authors are encouraged to provide a short proof sketch to provide intuition.
- Inversely, any informal proof provided in the core of the paper should be complemented by formal proofs provided in appendix or supplemental material.
- Theorems and Lemmas that the proof relies upon should be properly referenced.

#### 4. Experimental result reproducibility

Question: Does the paper fully disclose all the information needed to reproduce the main experimental results of the paper to the extent that it affects the main claims and/or conclusions of the paper (regardless of whether the code and data are provided or not)?

Answer: [\[Yes\]](#)

Justification: Sec. 1 and Sec. 4

Guidelines:

- The answer NA means that the paper does not include experiments.
- If the paper includes experiments, a No answer to this question will not be perceived well by the reviewers: Making the paper reproducible is important, regardless of whether the code and data are provided or not.
- If the contribution is a dataset and/or model, the authors should describe the steps taken to make their results reproducible or verifiable.
- Depending on the contribution, reproducibility can be accomplished in various ways. For example, if the contribution is a novel architecture, describing the architecture fully might suffice, or if the contribution is a specific model and empirical evaluation, it may be necessary to either make it possible for others to replicate the model with the same dataset, or provide access to the model. In general, releasing code and data is often one good way to accomplish this, but reproducibility can also be provided via detailed instructions for how to replicate the results, access to a hosted model (e.g., in the case of a large language model), releasing of a model checkpoint, or other means that are appropriate to the research performed.
- While NeurIPS does not require releasing code, the conference does require all submissions to provide some reasonable avenue for reproducibility, which may depend on the nature of the contribution. For example
  - (a) If the contribution is primarily a new algorithm, the paper should make it clear how to reproduce that algorithm.
  - (b) If the contribution is primarily a new model architecture, the paper should describe the architecture clearly and fully.
  - (c) If the contribution is a new model (e.g., a large language model), then there should either be a way to access this model for reproducing the results or a way to reproduce the model (e.g., with an open-source dataset or instructions for how to construct the dataset).
  - (d) We recognize that reproducibility may be tricky in some cases, in which case authors are welcome to describe the particular way they provide for reproducibility. In the case of closed-source models, it may be that access to the model is limited in some way (e.g., to registered users), but it should be possible for other researchers to have some path to reproducing or verifying the results.

#### 5. Open access to data and code

Question: Does the paper provide open access to the data and code, with sufficient instructions to faithfully reproduce the main experimental results, as described in supplemental material?

1004 Answer: [Yes]  
 1005 Justification: Sec. 1  
 1006 Guidelines:

- 1007 • The answer NA means that paper does not include experiments requiring code.
- 1008 • Please see the NeurIPS code and data submission guidelines (<https://nips.cc/public/guides/CodeSubmissionPolicy>) for more details.
- 1009 • While we encourage the release of code and data, we understand that this might not be
- 1010 possible, so “No” is an acceptable answer. Papers cannot be rejected simply for not
- 1011 including code, unless this is central to the contribution (e.g., for a new open-source
- 1012 benchmark).
- 1013 • The instructions should contain the exact command and environment needed to run to
- 1014 reproduce the results. See the NeurIPS code and data submission guidelines (<https://nips.cc/public/guides/CodeSubmissionPolicy>) for more details.
- 1015 • The authors should provide instructions on data access and preparation, including how
- 1016 to access the raw data, preprocessed data, intermediate data, and generated data, etc.
- 1017 • The authors should provide scripts to reproduce all experimental results for the new
- 1018 proposed method and baselines. If only a subset of experiments are reproducible, they
- 1019 should state which ones are omitted from the script and why.
- 1020 • At submission time, to preserve anonymity, the authors should release anonymized
- 1021 versions (if applicable).
- 1022 • Providing as much information as possible in supplemental material (appended to the
- 1023 paper) is recommended, but including URLs to data and code is permitted.
- 1024
- 1025

1026 **6. Experimental setting/details**

1027 Question: Does the paper specify all the training and test details (e.g., data splits, hyper-

1028 parameters, how they were chosen, type of optimizer, etc.) necessary to understand the

1029 results?

1030 Answer: [Yes]  
 1031 Justification: Sec. 4  
 1032 Guidelines:

- 1033 • The answer NA means that the paper does not include experiments.
- 1034 • The experimental setting should be presented in the core of the paper to a level of detail
- 1035 that is necessary to appreciate the results and make sense of them.
- 1036 • The full details can be provided either with the code, in appendix, or as supplemental
- 1037 material.

1038 **7. Experiment statistical significance**

1039 Question: Does the paper report error bars suitably and correctly defined or other appropriate

1040 information about the statistical significance of the experiments?

1041 Answer: [Yes]  
 1042 Justification: Sec. 4  
 1043 Guidelines:

- 1044 • The answer NA means that the paper does not include experiments.
- 1045 • The authors should answer "Yes" if the results are accompanied by error bars, confi-
- 1046 dence intervals, or statistical significance tests, at least for the experiments that support
- 1047 the main claims of the paper.
- 1048 • The factors of variability that the error bars are capturing should be clearly stated (for
- 1049 example, train/test split, initialization, random drawing of some parameter, or overall
- 1050 run with given experimental conditions).
- 1051 • The method for calculating the error bars should be explained (closed form formula,
- 1052 call to a library function, bootstrap, etc.)
- 1053 • The assumptions made should be given (e.g., Normally distributed errors).
- 1054 • It should be clear whether the error bar is the standard deviation or the standard error
- 1055 of the mean.

- It is OK to report 1-sigma error bars, but one should state it. The authors should preferably report a 2-sigma error bar than state that they have a 96% CI, if the hypothesis of Normality of errors is not verified.
- For asymmetric distributions, the authors should be careful not to show in tables or figures symmetric error bars that would yield results that are out of range (e.g. negative error rates).
- If error bars are reported in tables or plots, The authors should explain in the text how they were calculated and reference the corresponding figures or tables in the text.

## 8. Experiments compute resources

Question: For each experiment, does the paper provide sufficient information on the computer resources (type of compute workers, memory, time of execution) needed to reproduce the experiments?

Answer: [Yes]

Justification: Appendix E

Guidelines:

- The answer NA means that the paper does not include experiments.
- The paper should indicate the type of compute workers CPU or GPU, internal cluster, or cloud provider, including relevant memory and storage.
- The paper should provide the amount of compute required for each of the individual experimental runs as well as estimate the total compute.
- The paper should disclose whether the full research project required more compute than the experiments reported in the paper (e.g., preliminary or failed experiments that didn't make it into the paper).

## 9. Code of ethics

Question: Does the research conducted in the paper conform, in every respect, with the NeurIPS Code of Ethics <https://neurips.cc/public/EthicsGuidelines>?

Answer: [Yes]

Justification:

Guidelines:

- The answer NA means that the authors have not reviewed the NeurIPS Code of Ethics.
- If the authors answer No, they should explain the special circumstances that require a deviation from the Code of Ethics.
- The authors should make sure to preserve anonymity (e.g., if there is a special consideration due to laws or regulations in their jurisdiction).

## 10. Broader impacts

Question: Does the paper discuss both potential positive societal impacts and negative societal impacts of the work performed?

Answer: [Yes]

Justification: Sec. 1 and Sec. 5

Guidelines:

- The answer NA means that there is no societal impact of the work performed.
- If the authors answer NA or No, they should explain why their work has no societal impact or why the paper does not address societal impact.
- Examples of negative societal impacts include potential malicious or unintended uses (e.g., disinformation, generating fake profiles, surveillance), fairness considerations (e.g., deployment of technologies that could make decisions that unfairly impact specific groups), privacy considerations, and security considerations.
- The conference expects that many papers will be foundational research and not tied to particular applications, let alone deployments. However, if there is a direct path to any negative applications, the authors should point it out. For example, it is legitimate to point out that an improvement in the quality of generative models could be used to

1107 generate deepfakes for disinformation. On the other hand, it is not needed to point out  
1108 that a generic algorithm for optimizing neural networks could enable people to train  
1109 models that generate Deepfakes faster.

- 1110 • The authors should consider possible harms that could arise when the technology is  
1111 being used as intended and functioning correctly, harms that could arise when the  
1112 technology is being used as intended but gives incorrect results, and harms following  
1113 from (intentional or unintentional) misuse of the technology.
- 1114 • If there are negative societal impacts, the authors could also discuss possible mitigation  
1115 strategies (e.g., gated release of models, providing defenses in addition to attacks,  
1116 mechanisms for monitoring misuse, mechanisms to monitor how a system learns from  
1117 feedback over time, improving the efficiency and accessibility of ML).

## 11. Safeguards

1119 Question: Does the paper describe safeguards that have been put in place for responsible  
1120 release of data or models that have a high risk for misuse (e.g., pretrained language models,  
1121 image generators, or scraped datasets)?

1122 Answer: [NA]

1123 Justification:

1124 Guidelines:

- 1125 • The answer NA means that the paper poses no such risks.
- 1126 • Released models that have a high risk for misuse or dual-use should be released with  
1127 necessary safeguards to allow for controlled use of the model, for example by requiring  
1128 that users adhere to usage guidelines or restrictions to access the model or implementing  
1129 safety filters.
- 1130 • Datasets that have been scraped from the Internet could pose safety risks. The authors  
1131 should describe how they avoided releasing unsafe images.
- 1132 • We recognize that providing effective safeguards is challenging, and many papers do  
1133 not require this, but we encourage authors to take this into account and make a best  
1134 faith effort.

## 12. Licenses for existing assets

1136 Question: Are the creators or original owners of assets (e.g., code, data, models), used in  
1137 the paper, properly credited and are the license and terms of use explicitly mentioned and  
1138 properly respected?

1139 Answer: [Yes]

1140 Justification: Appendix E

1141 Guidelines:

- 1142 • The answer NA means that the paper does not use existing assets.
- 1143 • The authors should cite the original paper that produced the code package or dataset.
- 1144 • The authors should state which version of the asset is used and, if possible, include a  
1145 URL.
- 1146 • The name of the license (e.g., CC-BY 4.0) should be included for each asset.
- 1147 • For scraped data from a particular source (e.g., website), the copyright and terms of  
1148 service of that source should be provided.
- 1149 • If assets are released, the license, copyright information, and terms of use in the  
1150 package should be provided. For popular datasets, [paperswithcode.com/datasets](https://paperswithcode.com/datasets)  
1151 has curated licenses for some datasets. Their licensing guide can help determine the  
1152 license of a dataset.
- 1153 • For existing datasets that are re-packaged, both the original license and the license of  
1154 the derived asset (if it has changed) should be provided.
- 1155 • If this information is not available online, the authors are encouraged to reach out to  
1156 the asset's creators.

## 13. New assets

1158 Question: Are new assets introduced in the paper well documented and is the documentation  
1159 provided alongside the assets?



1160 Answer: [Yes]  
 1161 Justification: <https://anonymous.4open.science/r/AiDE-Q-C511>  
 1162 Guidelines:  
 1163 • The answer NA means that the paper does not release new assets.  
 1164 • Researchers should communicate the details of the dataset/code/model as part of their  
 1165 submissions via structured templates. This includes details about training, license,  
 1166 limitations, etc.  
 1167 • The paper should discuss whether and how consent was obtained from people whose  
 1168 asset is used.  
 1169 • At submission time, remember to anonymize your assets (if applicable). You can either  
 1170 create an anonymized URL or include an anonymized zip file.

1171 **14. Crowdsourcing and research with human subjects**  
 1172 Question: For crowdsourcing experiments and research with human subjects, does the paper  
 1173 include the full text of instructions given to participants and screenshots, if applicable, as  
 1174 well as details about compensation (if any)?  
 1175 Answer: [NA]  
 1176 Justification:  
 1177 Guidelines:  
 1178 • The answer NA means that the paper does not involve crowdsourcing nor research with  
 1179 human subjects.  
 1180 • Including this information in the supplemental material is fine, but if the main contribu-  
 1181 tion of the paper involves human subjects, then as much detail as possible should be  
 1182 included in the main paper.  
 1183 • According to the NeurIPS Code of Ethics, workers involved in data collection, curation,  
 1184 or other labor should be paid at least the minimum wage in the country of the data  
 1185 collector.

1186 **15. Institutional review board (IRB) approvals or equivalent for research with human**  
 1187 **subjects**  
 1188 Question: Does the paper describe potential risks incurred by study participants, whether  
 1189 such risks were disclosed to the subjects, and whether Institutional Review Board (IRB)  
 1190 approvals (or an equivalent approval/review based on the requirements of your country or  
 1191 institution) were obtained?  
 1192 Answer: [NA]  
 1193 Justification:  
 1194 Guidelines:  
 1195 • The answer NA means that the paper does not involve crowdsourcing nor research with  
 1196 human subjects.  
 1197 • Depending on the country in which research is conducted, IRB approval (or equivalent)  
 1198 may be required for any human subjects research. If you obtained IRB approval, you  
 1199 should clearly state this in the paper.  
 1200 • We recognize that the procedures for this may vary significantly between institutions  
 1201 and locations, and we expect authors to adhere to the NeurIPS Code of Ethics and the  
 1202 guidelines for their institution.  
 1203 • For initial submissions, do not include any information that would break anonymity (if  
 1204 applicable), such as the institution conducting the review.

1205 **16. Declaration of LLM usage**  
 1206 Question: Does the paper describe the usage of LLMs if it is an important, original, or  
 1207 non-standard component of the core methods in this research? Note that if the LLM is used  
 1208 only for writing, editing, or formatting purposes and does not impact the core methodology,  
 1209 scientific rigorousness, or originality of the research, declaration is not required.  
 1210 Answer: [No]

1211

Justification:

1212

Guidelines:

1213

- The answer NA means that the core method development in this research does not involve LLMs as any important, original, or non-standard components.

1214

1215

- Please refer to our LLM policy (<https://neurips.cc/Conferences/2025/LLM>) for what should or should not be described.

1216
